# Supplementary material
Source: MDPI journal article supplement (https://www.mdpi.com/2071-1050/12/12/5147)
Supplement: s1 [file s1]

## Taxonomy of Crisis Management Functions

### version 2.1, May 2020

---

This Supplement to the article Todor Tagarev, Valeri Ratchev, “A Taxonomy of Crisis Management Functions,” presents the taxonomy in a textual format, listing all taxonomy fields and, where relevant, their more detailed description.

Table S1 defines the acronyms used in the taxonomy.

Table S2 presents the notation followed in the four levels of the taxonomy – functional area, function, sub-function, and task.

Table S3 lists all taxonomy fields with their description.

**Table S1. List of Acronyms**

| Acronym       | Definition                                                              |
|---------------|-------------------------------------------------------------------------|
| <b>C3</b>     | Command, Control, and Coordination                                      |
| <b>CAX</b>    | Computer Assisted Exercise                                              |
| <b>CBRN</b>   | Chemical, Biological, Radiological, Nuclear                             |
| <b>CBRNE</b>  | Chemical, Biological, Radiological, Nuclear, Environmental (protection) |
| <b>CCIM</b>   | Crisis Communications and Information Management                        |
| <b>CI</b>     | Critical Infrastructure                                                 |
| <b>CII</b>    | Critical Information Infrastructure                                     |
| <b>CM</b>     | Crisis Management                                                       |
| <b>COP</b>    | Common Operational Picture                                              |
| <b>HAZMAT</b> | Hazardous Materials                                                     |
| <b>HQ</b>     | Headquarters                                                            |
| <b>IED</b>    | Improvised Explosive Device                                             |
| <b>MHPSS</b>  | Mental Health and Psycho-Social Support                                 |
| <b>PPP</b>    | Public-Private Partnership                                              |
| <b>SAR</b>    | Search And Rescue                                                       |
| <b>SOP</b>    | Standard Operating Procedure                                            |
| <b>UAV</b>    | Unmanned Aerial Vehicle                                                 |

**Table S2. Notations in the textual presentation of the taxonomy**

| Taxonomy Field        | Description                                                                                                                  |
|-----------------------|------------------------------------------------------------------------------------------------------------------------------|
| Functional Area “XXX” |                                                                                                                              |
| <b>Function Yyy</b>   | Description of Function Yyy                                                                                                  |
| Sub-function Zzz      | Description of sub-function Zzz; may include tasks (a), (b), (c), ..., when these tasks are not detailed at the lower level. |
| <i>Task Www</i>       | <i>Description of Task Www</i>                                                                                               |

**Table S3. Taxonomy fields and descriptions**

| Taxonomy Field                                                             | Description                                                                                                                                                                                                                                                                                                                                                                                                                                                                                                                                                                                                                                                                                                                                                                                                                                                                                                                                                                                     |
|----------------------------------------------------------------------------|-------------------------------------------------------------------------------------------------------------------------------------------------------------------------------------------------------------------------------------------------------------------------------------------------------------------------------------------------------------------------------------------------------------------------------------------------------------------------------------------------------------------------------------------------------------------------------------------------------------------------------------------------------------------------------------------------------------------------------------------------------------------------------------------------------------------------------------------------------------------------------------------------------------------------------------------------------------------------------------------------|
| Preparatory Functional Area “MITIGATION”                                   |                                                                                                                                                                                                                                                                                                                                                                                                                                                                                                                                                                                                                                                                                                                                                                                                                                                                                                                                                                                                 |
| <b>Organise for mitigation</b>                                             |                                                                                                                                                                                                                                                                                                                                                                                                                                                                                                                                                                                                                                                                                                                                                                                                                                                                                                                                                                                                 |
| Define national mitigation framework                                       | <p>Develop a national mitigation framework, incl.:</p> <ul style="list-style-type: none"> <li>a. Perform national crisis risk assessment and define the scope of mitigation measures and activities</li> <li>b. Identify the key mitigation actors and stakeholders</li> <li>c. Establish stakeholders’ roles and responsibilities for hazards’ mitigation</li> <li>d. Define the core capabilities necessary to prepare for the specific types of disasters and crises that pose the greatest risk to the security of the people</li> <li>e. Relate the mitigation objectives and approaches to the remaining CM functional areas.</li> <li>f. Establish joint CM command structure, encompassing state/federal, regional and local levels, capable of applying standardised procedures and coordinating international operations</li> <li>g. Establish mitigation long-term and operational planning and resource framework at local, regional, national, and international levels</li> </ul> |
| Develop expertise for hazards mapping, vulnerabilities and risk assessment | Provide scientific advice, modelling and simulations, and technical expertise for hazards mapping, vulnerabilities assessment, and risk assessment to support mitigation policy-making and planning, e.g. in the elaboration and prioritisation of mitigation measures                                                                                                                                                                                                                                                                                                                                                                                                                                                                                                                                                                                                                                                                                                                          |

| Taxonomy Field                                                 | Description                                                                                                                                                                                                                                                                                                                                                                                                                                                                                                                                                                                                                                                                                                                            |
|----------------------------------------------------------------|----------------------------------------------------------------------------------------------------------------------------------------------------------------------------------------------------------------------------------------------------------------------------------------------------------------------------------------------------------------------------------------------------------------------------------------------------------------------------------------------------------------------------------------------------------------------------------------------------------------------------------------------------------------------------------------------------------------------------------------|
| Provide for mitigation cooperation and coordination            | <p>Provide for cooperation between governments and CM agencies to overcome cultural, institutional and legislative issues between countries in developing a common, all-hazards mitigation approach:</p> <ol style="list-style-type: none"> <li>Encourage the exchange of good practices on resilience to hazards and sustainability, as well as on crisis prevention, preparation, training, response and recovery</li> <li>Coordinate the use of international mechanisms such as the EU Civil Protection Mechanism, UN and other mechanisms</li> </ol>                                                                                                                                                                              |
| <b>Assess the risks</b>                                        |                                                                                                                                                                                                                                                                                                                                                                                                                                                                                                                                                                                                                                                                                                                                        |
| Conduct all-hazards identification, documentation and analysis | <p>Undertake hazards identification, registration and analysis using an approved, recognised methodology that considers all plausible hazards, both natural and human-made, incl.:</p> <ol style="list-style-type: none"> <li>Document and make publicly available hazard identification and analysis (risk assessments) to stakeholders and community members, and review them regularly</li> <li>Support risk assessment with scientific data, the use of GIS, and analysis of historical and projected impacts to identify area specific exposures and vulnerabilities</li> </ol>                                                                                                                                                   |
| Assess vulnerabilities to hazards                              | <p>Assess exposure and vulnerabilities of critical infrastructures, assets and essential services to hazards, cyber and CBRNE threats, incl.:</p> <ol style="list-style-type: none"> <li>Define infrastructure and assets potentially affected by hazards, cyber and CBRNE threats</li> <li>Set vulnerability assessment criteria</li> <li>Identify critical infrastructure and assets</li> <li>Quantify the infrastructure and assets' value</li> <li>Assess vulnerabilities of essential services</li> </ol>                                                                                                                                                                                                                         |
| Estimate the risks                                             | <p>Estimate risks by performing the following tasks:</p> <ol style="list-style-type: none"> <li>Collect evidence and define the risk factors (establish a scale)</li> <li>Establish database on population, economic, housing, health, infrastructure, climate, land, water, raw resources, cultural heritage, etc.</li> <li>Establish hazards scenarios, including cyber and CBRNE threats</li> <li>Assess hazards impact to people, essential functions of the government and local administration, physical and digital infrastructure and assets and evaluate the levels of risks</li> <li>Develop and maintain civil security (e.g. vulnerability to hazards and threats) maps at national, regional, and local levels</li> </ol> |
| Estimate cascading effects                                     | Estimate the impact of possible cascading effects, e.g. a flood leading to epidemics or an earthquake causing a dam failure                                                                                                                                                                                                                                                                                                                                                                                                                                                                                                                                                                                                            |
| Estimate cross-domain effects                                  | Estimate possible cross-domain effects under the impact of concrete hazards, e.g. a natural disaster leading to mass disorders                                                                                                                                                                                                                                                                                                                                                                                                                                                                                                                                                                                                         |
| Estimate cross-border impact                                   | Estimate possible cross-border impact of hazards                                                                                                                                                                                                                                                                                                                                                                                                                                                                                                                                                                                                                                                                                       |

| Taxonomy Field                                                                 | Description                                                                                                                                                                                                                                                                                                                                                                                                                                                                                                                                                                                                                                                                               |
|--------------------------------------------------------------------------------|-------------------------------------------------------------------------------------------------------------------------------------------------------------------------------------------------------------------------------------------------------------------------------------------------------------------------------------------------------------------------------------------------------------------------------------------------------------------------------------------------------------------------------------------------------------------------------------------------------------------------------------------------------------------------------------------|
| <b>Elaborate mitigation policy and strategy</b>                                |                                                                                                                                                                                                                                                                                                                                                                                                                                                                                                                                                                                                                                                                                           |
| Provide policy guidance                                                        | <p>Prepare and issue policy guidance by performing the following tasks:</p> <ol style="list-style-type: none"> <li>Analyse the effect of potential mitigation measures on hazards, cyber and CBRNE threats</li> <li>Analyse the effect of potential mitigation measures on the exposure of critical infrastructure and assets to hazards</li> <li>Collect, organise and use evidence to assess effects of mitigation measures</li> <li>Implement modelling and simulation to assess effects of mitigation measures</li> <li>Define mitigation principles and goals</li> </ol>                                                                                                             |
| Formulate the mitigation strategy                                              | <p>Formulate the mitigation strategy by performing the following tasks:</p> <ol style="list-style-type: none"> <li>Define mitigation strategy goals</li> <li>Provide “goals-to-tasks” analysis</li> <li>Define mitigation measures (plans and programmes; at state, regional and local level, international)</li> <li>Select and prioritise mitigation measures</li> </ol>                                                                                                                                                                                                                                                                                                                |
| Establish planning and coordination                                            | <p>Establish a mechanism for mitigation planning and coordination, including the following tasks:</p> <ol style="list-style-type: none"> <li>Prepare professional staff for mitigation planning and implementation of mitigation measures</li> <li>Conduct demonstrations</li> <li>Establish and certify educational modules</li> </ol>                                                                                                                                                                                                                                                                                                                                                   |
| Conduct a mitigation communication campaign                                    | Initiate, coordinate, and conduct a mitigation communication campaign                                                                                                                                                                                                                                                                                                                                                                                                                                                                                                                                                                                                                     |
| <b>Implement mitigation measures</b>                                           |                                                                                                                                                                                                                                                                                                                                                                                                                                                                                                                                                                                                                                                                                           |
| Explore usability of natural values                                            | <p>Explore usability of natural values, incl.:</p> <ol style="list-style-type: none"> <li>Further develop the multi-functionality of forests, land, rivers, lakes, seashore, and others through supporting the economic, recreational and amenity value chains</li> <li>Stimulate the incorporation of new approaches to restoration of natural values into policy and management protocols</li> <li>Develop a shared view of priorities for natural stakes (e.g. map of soil erosion risk)</li> <li>Develop new approaches for long-term biomass management</li> <li>Regularly update the information on ecosystems vulnerability to various fire recurrences and intensities</li> </ol> |
| Facilitate the implementation of a zero-waste approach to reduce hazards risks | Promote technology and practice of using residual materials that may cause massive hazards, e.g. stimulate residual forestry biomass exploitation by private owners establishing specific markets and procedures to reduce the forest fires threat                                                                                                                                                                                                                                                                                                                                                                                                                                        |

| Taxonomy Field                                                 | Description                                                                                                                                                                                                                                                                                                                                                                                                                                                                                                                                                                                                                                                                                                                                                                                                                                                                                                                                                                                                                                                                                                                                                                                                                                                                                                                                                                                                                                                                                                                                                                                                                          |
|----------------------------------------------------------------|--------------------------------------------------------------------------------------------------------------------------------------------------------------------------------------------------------------------------------------------------------------------------------------------------------------------------------------------------------------------------------------------------------------------------------------------------------------------------------------------------------------------------------------------------------------------------------------------------------------------------------------------------------------------------------------------------------------------------------------------------------------------------------------------------------------------------------------------------------------------------------------------------------------------------------------------------------------------------------------------------------------------------------------------------------------------------------------------------------------------------------------------------------------------------------------------------------------------------------------------------------------------------------------------------------------------------------------------------------------------------------------------------------------------------------------------------------------------------------------------------------------------------------------------------------------------------------------------------------------------------------------|
| Apply long-term vulnerability reduction measures               | <p>Apply long-term vulnerability reduction and mitigation measures, incl.:</p> <ul style="list-style-type: none"> <li>a. Introduce land use planning and design decisions that avoid developments and community infrastructure in areas prone to hazards to reduce their possible impact and avoid risk to life, property and environment</li> <li>b. Ensure the reliability of critical infrastructure (such as physical facilities, supply chains, systems, assets, information technologies and communication networks) that provide essential services to the people (incl. safe drinking water, food, reliable transport, accessible public health services, energy for homes and industry, access to banking, finance and government services, and communications networks to connect the people socially and in business)</li> <li>c. Adopt and enforce hazard-resistant building codes and standards</li> <li>d. Design improvements to the existing infrastructure and essential services</li> <li>e. Perform capital works to reduce the impact of regular hazards such as seasonal flooding, icing, wildfires, tornados and others</li> <li>f. Establish back-up data storage and processing systems</li> <li>g. Take systematic measures to protect the landscape and environment form irreversible degradation</li> <li>h. Employ build-in safety, security and resilience into the design and operation of assets, systems, and networks</li> <li>i. Facilitate the establishment and maintain local, e.g. neighbourhood, volunteers' associations for response to hazards and disasters</li> <li>j. Others</li> </ul> |
| Enhance education, awareness and skills on mitigation measures | <p>Enhance education, awareness and skills in devising and implementing mitigation measures, incl.:</p> <ul style="list-style-type: none"> <li>a. Conduct community awareness campaigns to increase knowledge of how to prepare for disaster events</li> <li>b. Introduce general education programmes to build knowledge on the appropriate actions to prepare for and respond to a disaster event</li> <li>c. Conduct training and exercise programmes to improve skills and coordination in devising and implementing mitigation measures</li> </ul>                                                                                                                                                                                                                                                                                                                                                                                                                                                                                                                                                                                                                                                                                                                                                                                                                                                                                                                                                                                                                                                                              |
| <b>Keep the mitigation strategy relevant</b>                   |                                                                                                                                                                                                                                                                                                                                                                                                                                                                                                                                                                                                                                                                                                                                                                                                                                                                                                                                                                                                                                                                                                                                                                                                                                                                                                                                                                                                                                                                                                                                                                                                                                      |
| Establish a reporting mechanism                                | Establish a mechanism for regular reporting on results and performance in the implementation of mitigation policies, programmes, and measures                                                                                                                                                                                                                                                                                                                                                                                                                                                                                                                                                                                                                                                                                                                                                                                                                                                                                                                                                                                                                                                                                                                                                                                                                                                                                                                                                                                                                                                                                        |
| Assess mitigation strategy's implementation                    | Regularly review and assess results, effects, and the efficiency in the implementation of the mitigation strategy and related policies and programmes                                                                                                                                                                                                                                                                                                                                                                                                                                                                                                                                                                                                                                                                                                                                                                                                                                                                                                                                                                                                                                                                                                                                                                                                                                                                                                                                                                                                                                                                                |
| Amend and update the mitigation strategy                       | Amend and update the mitigation strategy and respective policies and programmes                                                                                                                                                                                                                                                                                                                                                                                                                                                                                                                                                                                                                                                                                                                                                                                                                                                                                                                                                                                                                                                                                                                                                                                                                                                                                                                                                                                                                                                                                                                                                      |
| Preparatory Functional Area <b>"CAPABILITY DEVELOPMENT"</b>    |                                                                                                                                                                                                                                                                                                                                                                                                                                                                                                                                                                                                                                                                                                                                                                                                                                                                                                                                                                                                                                                                                                                                                                                                                                                                                                                                                                                                                                                                                                                                                                                                                                      |
| <b>Plan for CM capabilities</b>                                |                                                                                                                                                                                                                                                                                                                                                                                                                                                                                                                                                                                                                                                                                                                                                                                                                                                                                                                                                                                                                                                                                                                                                                                                                                                                                                                                                                                                                                                                                                                                                                                                                                      |

| Taxonomy Field                                                           | Description                                                                                                                                                                                                                                                                                                                                                                                                                                                                                                                              |
|--------------------------------------------------------------------------|------------------------------------------------------------------------------------------------------------------------------------------------------------------------------------------------------------------------------------------------------------------------------------------------------------------------------------------------------------------------------------------------------------------------------------------------------------------------------------------------------------------------------------------|
| Establish a CM policy framework                                          | Establish a crisis management policy framework, i.e.: <ol style="list-style-type: none"> <li>Formulate and approve CM policy framework in terms of objectives, tasks, and responsibilities</li> <li>Conduct high-level cost-benefit analysis of the CM options, e.g., is it cheaper to reduce a vulnerability or to replace infrastructure and equipment; balance of investments in mitigation, protection, and response, etc.</li> <li>Define priorities</li> <li>Make the policy framework available to all CM stakeholders</li> </ol> |
| Promote standards for assessment of hazards and interoperability         | Promote standards to provide for commonality of hazards' assessment and interoperability, e.g. common standards of fuel characterisation in regions prone to wildfires, data exchange formats, map symbols, etc.                                                                                                                                                                                                                                                                                                                         |
| Determine future crises' scenarios and key characteristics               | Determine key characteristics of future crises (type, scope, intensity, dynamics, complexity, impact, etc.), elaborate and analyse respective scenarios and select a set of scenarios to be used in the planning process                                                                                                                                                                                                                                                                                                                 |
| Define required CM capabilities                                          | Define required crisis management CM capabilities, i.e.: <ol style="list-style-type: none"> <li>Develop a CM concept of operations</li> <li>Formulate and coordinate a national generic CM task list</li> <li>Conduct mission-to-task analysis</li> <li>Define key capability clusters</li> <li>Set-up capability goals</li> </ol>                                                                                                                                                                                                       |
| Assess current capabilities                                              | Collect and organise the information on current crisis management capabilities and assess their adequacy vis-a-vis the set of scenarios                                                                                                                                                                                                                                                                                                                                                                                                  |
| Identify gaps and redundancies                                           | Compare required and current capabilities; Identify capability gaps and redundant capabilities                                                                                                                                                                                                                                                                                                                                                                                                                                           |
| Define capability options                                                | Generate and compare various options to meet capability requirements, e.g. upgrade existing or procure new equipment; introduce new training standards; invest in specialised or general-purpose CM units; maintain in-house or outsource the capability, etc.                                                                                                                                                                                                                                                                           |
| Test the capability options                                              | Test the capability options against resource constraints and CM priorities                                                                                                                                                                                                                                                                                                                                                                                                                                                               |
| Coordinate and approve capability development plans                      | Coordinate planning processes and key resource allocation decisions among main contributing agencies; Approve capability development plans                                                                                                                                                                                                                                                                                                                                                                                               |
| <b>Manage CM system of systems development</b>                           |                                                                                                                                                                                                                                                                                                                                                                                                                                                                                                                                          |
| Develop integrated warning and alerting                                  | Develop an integrated warning and alerts system                                                                                                                                                                                                                                                                                                                                                                                                                                                                                          |
| <i>Build broadcast-, cable- and satellite-based messaging capability</i> | <i>Build message dissemination capability utilising broadcast, cable, satellite, and wireline services</i>                                                                                                                                                                                                                                                                                                                                                                                                                               |

| <b>Taxonomy Field</b>                                                                          | <b>Description</b>                                                                                                                                                                                                                                                                                                                                                                                         |
|------------------------------------------------------------------------------------------------|------------------------------------------------------------------------------------------------------------------------------------------------------------------------------------------------------------------------------------------------------------------------------------------------------------------------------------------------------------------------------------------------------------|
| <i>Build messaging to mobile devices capability</i>                                            | <i>Build message dissemination capability to broadcast to mobile devices</i>                                                                                                                                                                                                                                                                                                                               |
| <i>Create radio-based weather information network</i>                                          | <i>Create and maintain radio-based weather information network</i>                                                                                                                                                                                                                                                                                                                                         |
| <i>Organise Internet-based emergency messaging</i>                                             | <i>Organise a system for Internet-based emergency messaging</i>                                                                                                                                                                                                                                                                                                                                            |
| <i>Perform tests to assess warning systems' reliability</i>                                    | <i>Perform tests to assess the warning systems' reliability, incl.:</i> <ul style="list-style-type: none"> <li><i>a. Technical reliability of the systems' components</i></li> <li><i>b. Inherited system reliability</i></li> <li><i>c. The reliability of networks of detection and warning systems (fire, weather, air pollution, temperature, earthquake, tsunami, tornado, and others)</i></li> </ul> |
| Develop the C3 system                                                                          | Develop the command, control, and coordination system (presented in detail in Common Functional Area "C3")                                                                                                                                                                                                                                                                                                 |
| Develop the communications and information management system                                   | Develop the crisis communications and information management system (presented in detail in Common Functional Area "Crisis communications and Information management")                                                                                                                                                                                                                                     |
| Develop awareness and decision support systems                                                 | Develop CM awareness and decision support systems to facilitate the performance of the tasks enumerated below                                                                                                                                                                                                                                                                                              |
| <i>Access, integrate and display images and video from the incident scene</i>                  | <i>Access, integrate and display images and video from the incident scene (for the on-scene responder and incident command)</i>                                                                                                                                                                                                                                                                            |
| <i>Merge disparate data and non-traditional sources in real time</i>                           | <i>Merge disparate data and non-traditional (incl. crowdsourcing and social media) sources in real time (e.g. known hazards, building blueprints, ownership records) to support situational awareness</i>                                                                                                                                                                                                  |
| <i>Maintain a high-level view of the incident scene</i>                                        | <i>Obtain and maintain a high-level (bird's-eye) view of the incident scene</i>                                                                                                                                                                                                                                                                                                                            |
| <i>Define in real time the location of responders and their proximity to risks and hazards</i> | <i>Define the location of responders (including latitude, longitude and altitude/depth) and their proximity to risks and hazards in real time (indoors and outdoors)</i>                                                                                                                                                                                                                                   |
| <i>Identify suitable sites for staging, command posts and ingress/ egress routes</i>           | <i>Identify suitable sites for a staging area, establishing command posts and suitable ingress/ egress routes</i>                                                                                                                                                                                                                                                                                          |

| Taxonomy Field                                                                               | Description                                                                                                                                                                                                                                                                                                                                                                                                                                                                                                                                                                           |
|----------------------------------------------------------------------------------------------|---------------------------------------------------------------------------------------------------------------------------------------------------------------------------------------------------------------------------------------------------------------------------------------------------------------------------------------------------------------------------------------------------------------------------------------------------------------------------------------------------------------------------------------------------------------------------------------|
| <i>Detect, monitor and analyse passive and active threats and hazards at incident scenes</i> | <i>Detect, monitor and analyse passive and active threats and hazards at incident scenes in real time; generate incident-specific maps tied to GIS coordinates for indoor and outdoor locations on the incident scene</i>                                                                                                                                                                                                                                                                                                                                                             |
| <i>Identify secondary incidents and effects during response and project consequences</i>     | <i>Identify secondary incidents and effects during response operations (e.g. after-effects) and project their consequences in time</i>                                                                                                                                                                                                                                                                                                                                                                                                                                                |
| <i>Identify hazardous agents and contaminants, incl. CBRN</i>                                | <i>Rapidly identify hazardous agents and contaminants on the incident scene, incl. CBRN</i>                                                                                                                                                                                                                                                                                                                                                                                                                                                                                           |
| <i>Predict the evolution and behaviour of hazards and disasters</i>                          | <i>Predict the evolution and behaviour of hazards and disasters</i>                                                                                                                                                                                                                                                                                                                                                                                                                                                                                                                   |
| <i>Develop and evaluate alternative courses of action</i>                                    | <i>Develop and evaluate alternative courses of action</i>                                                                                                                                                                                                                                                                                                                                                                                                                                                                                                                             |
| <i>Evaluate responders' performance and outcomes</i>                                         | <i>Evaluate responders' performance and outcomes</i>                                                                                                                                                                                                                                                                                                                                                                                                                                                                                                                                  |
| Establish resource management and mutual aid system                                          | Establish resource management and mutual aid system, including: <ul style="list-style-type: none"> <li>a. Build decision support information capability for collecting, updating, and processing data, and tracking resources</li> <li>b. Define acquisition/ procurement procedures</li> <li>c. Establish a system for provision of mutual aid between different levels of crisis command and management</li> <li>d. Determine flow of requests and responds at national (inter-agency), regional, and local levels</li> </ul>                                                       |
| Establish a crisis logistics management system                                               | Establish crisis logistics management system (presented in detail in Common Functional Area "Logistics")                                                                                                                                                                                                                                                                                                                                                                                                                                                                              |
| Establish a solid waste collection system                                                    | Establish a solid waste collection system (see also Operational Functional Area "Recovery")                                                                                                                                                                                                                                                                                                                                                                                                                                                                                           |
| Manage equipment and infrastructure acquisition                                              | Manage the CM equipment and infrastructure acquisition, including performance of the following tasks: <ul style="list-style-type: none"> <li>a. Determine required capabilities</li> <li>b. Establish interoperability requirements/ standards</li> <li>c. Determine the key equipment life cycle</li> <li>d. Establish equipment certification procedures</li> <li>e. Regulate centralised/ decentralised acquisition procedures</li> <li>f. Manage acquisition contracts</li> <li>g. Manage the equipment life-cycle</li> <li>h. Enhance the resilience of supply chains</li> </ul> |



| <b>Taxonomy Field</b>                                       | <b>Description</b>                                                                                                                                                                                                                                                                                                                                                                                                                                                                                         |
|-------------------------------------------------------------|------------------------------------------------------------------------------------------------------------------------------------------------------------------------------------------------------------------------------------------------------------------------------------------------------------------------------------------------------------------------------------------------------------------------------------------------------------------------------------------------------------|
| Manage the system of reserves                               | Manage the system of emergency and crisis reserves and stockpiles                                                                                                                                                                                                                                                                                                                                                                                                                                          |
| <b>Manage human resources</b>                               |                                                                                                                                                                                                                                                                                                                                                                                                                                                                                                            |
| Manage professional responders                              | <p>Manage career models and professional responders, i.e.</p> <ul style="list-style-type: none"> <li>a. Conduct general, regional, and local needs analysis</li> <li>b. Establish a framework of competencies and behavioural indicators</li> <li>c. Establish a CM profession with career paths and job requirements</li> <li>d. Select, organise, train, certify and motivate the professional responders</li> <li>e. Assure that CM leaders are knowledgeable, competent, and well supported</li> </ul> |
| Manage volunteers                                           | Manage organised and spontaneous volunteers                                                                                                                                                                                                                                                                                                                                                                                                                                                                |
| <i>Conduct needs analysis</i>                               | <i>Conduct needs analysis; assure adequate legislation for the use of volunteers</i>                                                                                                                                                                                                                                                                                                                                                                                                                       |
| <i>Select, organise, train, and motivate the volunteers</i> | <i>Select, organise, train, and motivate the volunteers; provide for allocation of responsibilities among relevant governmental and non-governmental organisations</i>                                                                                                                                                                                                                                                                                                                                     |
| <i>Task volunteers</i>                                      | <i>Provide preliminary tasking to organised volunteers across scenarios</i>                                                                                                                                                                                                                                                                                                                                                                                                                                |
| <i>Maintain registers of volunteers</i>                     | <i>Create and maintain current registers of volunteers, their competencies and tasking</i>                                                                                                                                                                                                                                                                                                                                                                                                                 |
| <i>Establish organisation for spontaneous volunteers</i>    | <i>Establish organisation to identify and register spontaneous volunteers and to assign them to teams and coordinators</i>                                                                                                                                                                                                                                                                                                                                                                                 |
| <i>Prepare for crowd tasking</i>                            | <i>Prepare for crowd tasking, i.e. tasking spontaneous volunteers</i>                                                                                                                                                                                                                                                                                                                                                                                                                                      |
| <b>Organise for crisis management</b>                       |                                                                                                                                                                                                                                                                                                                                                                                                                                                                                                            |
| Establish an integrated CM organisation                     | <p>Establish an integrated organisation for crisis management, i.e.:</p> <ul style="list-style-type: none"> <li>a. Establish a framework of authority at central, regional, and local level</li> <li>b. Achieve consensus on the overall CM process</li> <li>c. Establish legal lines of authority, duties, and responsibilities</li> <li>d. Establish CM HQ, supporting centres, and local command structures</li> </ul>                                                                                  |
| Define minimum activation requirements                      | Define a set of minimum activation requirements for situations at different levels of crisis command and management                                                                                                                                                                                                                                                                                                                                                                                        |
| Identify and analyse bottlenecks                            | Identify key resource constraints and potential bottlenecks in decision-making and provision of resources and analyse their potential impact                                                                                                                                                                                                                                                                                                                                                               |

| Taxonomy Field                                                                        | Description                                                                                                                                                                                                                                                                                                                                                                                                                                                                                      |
|---------------------------------------------------------------------------------------|--------------------------------------------------------------------------------------------------------------------------------------------------------------------------------------------------------------------------------------------------------------------------------------------------------------------------------------------------------------------------------------------------------------------------------------------------------------------------------------------------|
| Establish CM rules and standard operating procedures                                  | Establish rules and standard operating procedures for crisis management, i.e.: <ol style="list-style-type: none"> <li>Draft, co-ordinate, and approve CM legal acts</li> <li>Define critical pre-crisis, response, and recovery procedures for different levels of command and management</li> <li>Prepare, approve and communicate to all stakeholders SOPs for each hazard</li> <li>Establish hazards' information and data requirements and rules for their collection and sharing</li> </ol> |
| Establish protocols for cross-border emergencies                                      | Prepare and agree in the relevant international format on response protocols for cross-border emergencies                                                                                                                                                                                                                                                                                                                                                                                        |
| <b>Establish CM doctrine and train organisations and people</b>                       |                                                                                                                                                                                                                                                                                                                                                                                                                                                                                                  |
| Develop doctrine                                                                      | Develop, approve and disseminate among all stakeholders a Crisis Management doctrine                                                                                                                                                                                                                                                                                                                                                                                                             |
| Coordinate and conduct research and education                                         | Coordinate and conduct research and education, i.e.: <ol style="list-style-type: none"> <li>Organise hazard and CM studies and develop modelling and simulation capacity to understand data flows, bottlenecks, integration and interoperability issues</li> <li>Establish hazards and CM discipline and a research and education network</li> </ol>                                                                                                                                             |
| Train individuals, teams and organisations                                            | Train individuals, teams, organisations, and at national, regional, and local levels of crisis management                                                                                                                                                                                                                                                                                                                                                                                        |
| <i>Develop and conduct all-hazards training</i>                                       | <i>Develop and conduct national, regional, and local training to improve all-hazards CM capacity</i>                                                                                                                                                                                                                                                                                                                                                                                             |
| <i>Conduct CM exercises</i>                                                           | <i>Conduct exercises/drills of sufficient intensity to challenge the CM system</i>                                                                                                                                                                                                                                                                                                                                                                                                               |
| <i>Develop hazard-specific simulations and conduct CAX</i>                            | <i>Develop hazard-specific simulations and conduct table-top and computer and simulations assisted exercises and drills</i>                                                                                                                                                                                                                                                                                                                                                                      |
| <i>Provide training for interoperability between organisations and command levels</i> | <i>Provide instructions and national and international training for achieving interoperability between different organisations and CM command levels</i>                                                                                                                                                                                                                                                                                                                                         |
| Certify personnel, training and education                                             | Certify crisis management personnel, training centres, and educational institutions                                                                                                                                                                                                                                                                                                                                                                                                              |
| Train resilient communities                                                           | Train resilient communities, incl. for provision of MHPSS                                                                                                                                                                                                                                                                                                                                                                                                                                        |
| <b>Establish a CM lessons learning system</b>                                         |                                                                                                                                                                                                                                                                                                                                                                                                                                                                                                  |

| Taxonomy Field                                                                  | Description                                                                                                                                                                                                                                                                                                                                                                                                                                                                                                                                                                                                                                                                                              |
|---------------------------------------------------------------------------------|----------------------------------------------------------------------------------------------------------------------------------------------------------------------------------------------------------------------------------------------------------------------------------------------------------------------------------------------------------------------------------------------------------------------------------------------------------------------------------------------------------------------------------------------------------------------------------------------------------------------------------------------------------------------------------------------------------|
| Develop after-action and lessons learned reporting                              | Develop after-action and lessons learned reporting system and procedures, i.e.: <ol style="list-style-type: none"> <li>Develop lessons learned and after-action reporting procedures</li> <li>Establish lessons-learning database and analysis capacity and develop a collaborative platform to support new tools like situation reports, best practice guidelines, task sheets and checklists, exercise scenarios, etc.</li> <li>Adapt post-crisis reviews to feed a lessons-learned information system</li> <li>Provide interagency training of personnel on after-action reports analysis and drafting lessons learned</li> <li>Establish procedures for implementation of lessons learned</li> </ol> |
| Provide cross-border learning                                                   | Provide opportunities for cross-border learning                                                                                                                                                                                                                                                                                                                                                                                                                                                                                                                                                                                                                                                          |
| <i>Provide international CM education and training</i>                          | <i>Provide opportunities for international CM education and training</i>                                                                                                                                                                                                                                                                                                                                                                                                                                                                                                                                                                                                                                 |
| <i>Establish international evaluation of CM experience and lessons learning</i> | <i>Establish a mechanism for international evaluation of CM experience and lessons learning</i>                                                                                                                                                                                                                                                                                                                                                                                                                                                                                                                                                                                                          |
| Preparatory Functional Area “ <b>STRATEGIC ADAPTIVENESS</b> ”                   |                                                                                                                                                                                                                                                                                                                                                                                                                                                                                                                                                                                                                                                                                                          |
| <b>Promote CM organisational agility</b>                                        |                                                                                                                                                                                                                                                                                                                                                                                                                                                                                                                                                                                                                                                                                                          |
| Establish continuous monitoring                                                 | Establish continuous monitoring of the CM environment, i.e. horizon scanning, to support decision-making                                                                                                                                                                                                                                                                                                                                                                                                                                                                                                                                                                                                 |
| Promote knowledge centrality                                                    | Place knowledge in the centre of responders’ organisations and the wider network of stakeholders                                                                                                                                                                                                                                                                                                                                                                                                                                                                                                                                                                                                         |
| Maintain diverse and evolving competencies                                      | Maintain diverse competencies and perspectives and provide for continuous learning                                                                                                                                                                                                                                                                                                                                                                                                                                                                                                                                                                                                                       |
| Facilitate networking and cooperation                                           | Facilitate networking and cooperation among agencies, professional societies, and projects                                                                                                                                                                                                                                                                                                                                                                                                                                                                                                                                                                                                               |
| Exchange foresight experience and findings                                      | Exchange experience from foresight studies, their findings, consequent actions and evidence of impact                                                                                                                                                                                                                                                                                                                                                                                                                                                                                                                                                                                                    |
| Establish international exchange on adaptiveness                                | Establish opportunities for international exchange on organisational adaptiveness                                                                                                                                                                                                                                                                                                                                                                                                                                                                                                                                                                                                                        |
| <b>Conduct civil security foresight</b>                                         |                                                                                                                                                                                                                                                                                                                                                                                                                                                                                                                                                                                                                                                                                                          |

| Taxonomy Field                                               | Description                                                                                                                                                                                                                                                                                                                                                                                                                                                                                                                                                                                                                                                                                                          |
|--------------------------------------------------------------|----------------------------------------------------------------------------------------------------------------------------------------------------------------------------------------------------------------------------------------------------------------------------------------------------------------------------------------------------------------------------------------------------------------------------------------------------------------------------------------------------------------------------------------------------------------------------------------------------------------------------------------------------------------------------------------------------------------------|
| Identify key drivers and trends                              | <p>Identify key drivers of change and trends in the civil security environment, incl.:</p> <ol style="list-style-type: none"> <li>Analyse historical characteristics of critical hazards and form central databases with harmonised information on single-hazard events</li> <li>Update and detail the information on hazards' occurrence and behaviour in sensitive areas (e.g. wildland-urban), e.g. with respect to land use fragmentation and climate change</li> <li>Consider climate change in hazards' projections</li> <li>Include direct environmental losses (e.g. forests, infrastructures) and indirect losses (e.g. air quality, biodiversity, etc.) into the economic assessment of damages</li> </ol> |
| Identify plausible futures                                   | <p>Identify plausible future hazards, environments, and crisis management futures, incl.:</p> <ol style="list-style-type: none"> <li>Project and use projections of changes in hazards to evaluate impact of climate change on forest fires, floods, extreme weather, and others</li> <li>Identify thresholds of change and tipping points in ecosystem regeneration with account of climate trends and past land use management history</li> <li>Consider ecosystems functioning in the design of adaptation strategies</li> <li>Account for multiple risks in the management of forests, water, and land including biotic and abiotic disturbances (e.g. insects, wind storms, droughts, and others)</li> </ol>    |
| Explore the implications of alternative futures              | Explore the implications of alternative crisis management futures, e.g. conduct exercises (table top, academia) and simulations in alternative futures' scenarios                                                                                                                                                                                                                                                                                                                                                                                                                                                                                                                                                    |
| <b>Develop capacity to adapt</b>                             |                                                                                                                                                                                                                                                                                                                                                                                                                                                                                                                                                                                                                                                                                                                      |
| Develop options and estimate required resources              | Develop possible courses of action across plausible alternative futures and estimate respective required resources                                                                                                                                                                                                                                                                                                                                                                                                                                                                                                                                                                                                   |
| <i>Develop courses of action in alternative futures</i>      | <i>Develop potential courses of action in plausible alternative futures of crisis management</i>                                                                                                                                                                                                                                                                                                                                                                                                                                                                                                                                                                                                                     |
| <i>Develop policies for adaptation</i>                       | <p><i>Provide for adaptation of CM policies and management decisions, incl.:</i></p> <ol style="list-style-type: none"> <li><i>Assess relevance of existing CM policies and management decisions to alternative futures</i></li> <li><i>Identify adaptation and development pathways (with emphasis on hazard-resilient landscapes) per alternative futures</i></li> </ol>                                                                                                                                                                                                                                                                                                                                           |
| <i>Estimate resource requirements</i>                        | <i>Estimate resource requirements; Identify specific capability needs and critical resources per alternative futures</i>                                                                                                                                                                                                                                                                                                                                                                                                                                                                                                                                                                                             |
| <i>Establish coordination with military and other backup</i> | <i>Establish coordination with the military and other available backup units and personnel, e.g. organisations with CBRN capabilities</i>                                                                                                                                                                                                                                                                                                                                                                                                                                                                                                                                                                            |
| Create and maintain material reserves                        | Create and maintain materiel reserves, e.g. particular vaccines, for scenarios not considered likely in the near future, but are plausible in an alternative future (e.g. in grey and black swan scenarios)                                                                                                                                                                                                                                                                                                                                                                                                                                                                                                          |

| Taxonomy Field                                                                                 | Description                                                                                                                                                                                                                                                                                                                                                                                                                                                                                                                                                                                                                                                                                                                                                                                                                                                  |
|------------------------------------------------------------------------------------------------|--------------------------------------------------------------------------------------------------------------------------------------------------------------------------------------------------------------------------------------------------------------------------------------------------------------------------------------------------------------------------------------------------------------------------------------------------------------------------------------------------------------------------------------------------------------------------------------------------------------------------------------------------------------------------------------------------------------------------------------------------------------------------------------------------------------------------------------------------------------|
| Maintain hazards and CM research capacity and agenda                                           | Maintain hazards and crisis management research and development capacity and agenda, incl.: <ul style="list-style-type: none"> <li>a. Network, collaborate, communicate and share experiences</li> <li>b. Establish robust research governance and support structures, build-in monitoring, evaluation and lessons learning with account of alternative futures</li> <li>c. Conduct pilot and demonstration projects to facilitate innovation and prepare for uncertainty</li> <li>d. Develop flexible research agendas</li> </ul>                                                                                                                                                                                                                                                                                                                           |
| <b>Build and measure community resilience</b>                                                  |                                                                                                                                                                                                                                                                                                                                                                                                                                                                                                                                                                                                                                                                                                                                                                                                                                                              |
| Strengthen community assets for resilience                                                     | Strengthen the community financial, physical, MHPSS, political, human, social, and natural assets for resilience                                                                                                                                                                                                                                                                                                                                                                                                                                                                                                                                                                                                                                                                                                                                             |
| Provide for bonding and linking communities' assets across borders                             | Provide for bonding, bridging, and linking communities' assets across the country and throughout the European Union                                                                                                                                                                                                                                                                                                                                                                                                                                                                                                                                                                                                                                                                                                                                          |
| Improve communities' preparedness, responsiveness, learning, self-organisation, and innovation | Improve communities' preparedness, responsiveness, learning, self-organisation, and innovation, incl.: <ul style="list-style-type: none"> <li>a. Regularly update guidelines or procedures on how citizens should equip themselves for emergencies involving extreme events</li> <li>b. Stimulate the implementation of advanced restoration treatment</li> <li>c. Organise educational and awareness campaigns</li> <li>d. Develop new awareness raising methods to overcome attitude and behavioural barriers</li> </ul>                                                                                                                                                                                                                                                                                                                                   |
| Strengthen the communities' capacity for collective actions                                    | Strengthen the communities' capacity for collective actions for disaster risk reduction, conflict mitigation, social protection, natural resource management, and management of public goods and services: <ul style="list-style-type: none"> <li>a. Empower local communities with tools, information and skills to recognise the benefits of integrated hazards risk management</li> <li>b. Conduct awareness-raising campaigns for targeted stakeholder groups; Communicate the social, environmental and economic benefits of community action and resilience</li> <li>c. Adopt participatory planning to evaluate the general public's acceptance of a given hazard management policy in different regions</li> <li>d. Develop flexible crisis management plans and policies that account for the differences in local and regional contexts</li> </ul> |
| Establish measures and measurement of resilience                                               | Establish measures of resilience and measurement approaches, i.e.: <ul style="list-style-type: none"> <li>a. Explore community-based approaches for measuring resilience</li> <li>b. Establish measurement framework for community resilience</li> <li>c. Use modelling to analyse the impacts of community resilience</li> </ul>                                                                                                                                                                                                                                                                                                                                                                                                                                                                                                                            |
| Operational Functional Area <b>"PROTECTION"</b>                                                |                                                                                                                                                                                                                                                                                                                                                                                                                                                                                                                                                                                                                                                                                                                                                                                                                                                              |

| Taxonomy Field                                                      | Description                                                                                                                                                                                                                                                                                                                                                                                                                                                                                                                                                                                                                                                 |
|---------------------------------------------------------------------|-------------------------------------------------------------------------------------------------------------------------------------------------------------------------------------------------------------------------------------------------------------------------------------------------------------------------------------------------------------------------------------------------------------------------------------------------------------------------------------------------------------------------------------------------------------------------------------------------------------------------------------------------------------|
| <b>Conduct systematic monitoring and data collection</b>            |                                                                                                                                                                                                                                                                                                                                                                                                                                                                                                                                                                                                                                                             |
| Conduct monitoring and anticipation                                 | <p>Conduct continuous monitoring and anticipate emergencies and crises, i.e.:</p> <ul style="list-style-type: none"> <li>a. Scan continuously hazards and threats and exchange information in relevant regional, national, and global frameworks</li> <li>b. Gather and store required raw data using sensing, detection, and surveillance technologies</li> <li>c. Combine cyber detection and physical surveillance to better protect critical CM networks and assets as well as elements of the critical infrastructure and critical information infrastructure</li> <li>d. Share systematically information, analyses, and emergency reports</li> </ul> |
| Raise awareness and anticipate                                      | Conduct analysis to raise awareness and anticipate emergencies, crises and their impact                                                                                                                                                                                                                                                                                                                                                                                                                                                                                                                                                                     |
| <i>Combine status with consequence analysis</i>                     | <i>Combine 'current operational status' with consequence analysis to build a real-time geospatial framework in support of effective and timely decision-making</i>                                                                                                                                                                                                                                                                                                                                                                                                                                                                                          |
| <i>Provide predictive analysis and situational awareness</i>        | <i>Provide predictive analysis and deliver situational awareness to the decision-makers and first responders by using modelling, damage estimation, risk analysis, resource analysis and inventory, and organisational systems analysis</i>                                                                                                                                                                                                                                                                                                                                                                                                                 |
| <i>Maintain public awareness on hazards and respective services</i> | <i>Maintain public awareness on hazards, availability of respective services, and the means by which they can be accessed</i>                                                                                                                                                                                                                                                                                                                                                                                                                                                                                                                               |
| <i>Provide professional and public-relevant visualisation</i>       | <i>Provide professional and public-relevant visualisation of incidents and emergency situations and protection operations</i>                                                                                                                                                                                                                                                                                                                                                                                                                                                                                                                               |
| <b>Conduct operational planning</b>                                 |                                                                                                                                                                                                                                                                                                                                                                                                                                                                                                                                                                                                                                                             |
| Establish an operational planning framework                         | <p>Establish an operational planning framework, i.e.:</p> <ul style="list-style-type: none"> <li>a. Define planning assumptions to guide the development of operational plans</li> <li>b. Establish operations planning requirements for every level of CM command and management</li> <li>c. Determine jurisdictional priorities, objectives, tasks, and resource acquisitions and allocations needed to protect against and respond to potential hazards and threats</li> <li>d. Make the operational planning framework available to all government agencies, local authorities, non-governmental organisation and private business</li> </ul>           |
| Plan across ranges and level of activities                          | Perform planning across the full range of activities, at every level of CM command and management                                                                                                                                                                                                                                                                                                                                                                                                                                                                                                                                                           |
| Coordinate planning with support providers                          | Coordinate operational planning with military and other providers of support                                                                                                                                                                                                                                                                                                                                                                                                                                                                                                                                                                                |

| Taxonomy Field                                                                  | Description                                                                                                                                                                                                                                                                                                                                                         |
|---------------------------------------------------------------------------------|---------------------------------------------------------------------------------------------------------------------------------------------------------------------------------------------------------------------------------------------------------------------------------------------------------------------------------------------------------------------|
| <b>Conduct incident/emergency response (below the level of “crisis”)</b>        |                                                                                                                                                                                                                                                                                                                                                                     |
| Detect pending emergencies and provide early warning                            | Detect pending emergencies or other threatening situations and provide early warning                                                                                                                                                                                                                                                                                |
| <i>Conduct seismic monitoring and alert of geological hazards</i>               | <i>Conduct seismic monitoring activities to provide alerting of geological hazards and define roles and responsibilities on alerting</i>                                                                                                                                                                                                                            |
| <i>Conduct weather monitoring and alert on weather hazards</i>                  | <i>Conduct weather monitoring activities to provide alerting of weather-related hazards and define roles and responsibilities on alerting</i>                                                                                                                                                                                                                       |
| <i>Conduct permanent cyberspace monitoring</i>                                  | <i>Conduct permanent monitoring of cyber networks and assets that connect cyber-physical systems for access control, early warning, sensing, alarming, data storage, analysis and decision support, and physical control to limit the impact of possible attacks</i>                                                                                                |
| <i>Provide a composite threat picture of CBRNE</i>                              | <i>Detect illicit radioactive and nuclear materials; identify chemical, biological, and explosives’ threats and provide a composite threat picture across all modalities – radiation/nuclear, chemical, biological, and explosives</i>                                                                                                                              |
| <i>Conduct biological and epidemiological monitoring and alert on pandemics</i> | <i>Conduct biological and epidemiological monitoring activities to provide alerting of dangerous pandemics and define roles and responsibilities on alerting</i>                                                                                                                                                                                                    |
| <i>Warn in case of escalation</i>                                               | <i>Deliver warning information in case of escalation of incidents</i>                                                                                                                                                                                                                                                                                               |
| Coordinate and conduct incident SAR operations                                  | Coordinate and conduct incident search and rescue operations, i.e.: <ul style="list-style-type: none"> <li>a. Maintain in high readiness search and rescue capacities for urban, sea/water, and mountainous operations</li> <li>b. Conduct search and rescue operations</li> <li>c. Coordinate emergency medical and psychological aid to rescued people</li> </ul> |
| Conduct emergency firefighting                                                  | Conduct emergency firefighting, i.e.: <ul style="list-style-type: none"> <li>a. Maintain in high readiness sufficient firefighting capacities for urban, forest, and mountainous operations</li> <li>b. Conduct firefighting operations</li> <li>c. Coordinate emergency medical and psychological aid to affected people</li> </ul>                                |

| <b>Taxonomy Field</b>                                                                      | <b>Description</b>                                                                                                                                                                                                                                                                                                                                                                                                                          |
|--------------------------------------------------------------------------------------------|---------------------------------------------------------------------------------------------------------------------------------------------------------------------------------------------------------------------------------------------------------------------------------------------------------------------------------------------------------------------------------------------------------------------------------------------|
| Conduct emergency <i>radiation/nuclear, chemical, and biological</i> protection operations | Conduct emergency <i>radiation/nuclear, chemical, and biological</i> protection operations, i.e.: <ul style="list-style-type: none"> <li>a. Maintain, in coordination with the military, sufficient CBRN protection capacity</li> <li>b. Conduct CBRN operations</li> <li>c. Coordinate emergency medical and psychological aid to affected people</li> <li>d. Share threat information and analysis with international partners</li> </ul> |
| Conduct ammunition and counter-IED operations                                              | Conduct ammunition and counter-IED operations, i.e.: <ul style="list-style-type: none"> <li>a. Maintain, in coordination with the military, sufficient ammunition and counter-IED capacity</li> <li>b. Conduct ammunition and counter-IED operations</li> <li>c. Coordinate emergency medical and psychological aid to affected people</li> </ul>                                                                                           |
| Conduct limited emergency evacuation operations                                            | Conduct limited emergency evacuation operations, i.e.: <ul style="list-style-type: none"> <li>a. Maintain and coordinate with the military capacity for evacuation</li> <li>b. Conduct evacuation operations</li> <li>c. Provide temporary shelters and special housing</li> <li>d. Coordinate emergency medical and psychological aid to evacuated people</li> </ul>                                                                       |
| <b>Coordinate and provide public protection</b>                                            |                                                                                                                                                                                                                                                                                                                                                                                                                                             |
| Safeguard the public health                                                                | Safeguard the public health                                                                                                                                                                                                                                                                                                                                                                                                                 |
| <i>Provide epidemiological surveillance and investigation</i>                              | <i>Provide human and animal epidemiological surveillance and investigation</i>                                                                                                                                                                                                                                                                                                                                                              |
| <i>Apply preventive measures</i>                                                           | <i>Apply preventive measures, such as vaccines, immunisation, face masks, fluoridated water supply, iodised salt, etc., and psycho-educative measures</i>                                                                                                                                                                                                                                                                                   |
| <i>Perform food and water safety control</i>                                               | <i>Perform comprehensive and permanent food, water, and agriculture safety control, covering supply chains and warehouses</i>                                                                                                                                                                                                                                                                                                               |
| Assess safety, integrity and security of buildings                                         | Assess safety, structural integrity, and physical security of buildings                                                                                                                                                                                                                                                                                                                                                                     |
| Provide safety during mass public events                                                   | Provide safety during mass public events, i.e.: <ul style="list-style-type: none"> <li>a. Develop and implement case-specific public safety plans and guidelines</li> <li>b. Exploit public safety emergency communications systems</li> </ul>                                                                                                                                                                                              |
| <b>Protect critical infrastructures</b>                                                    |                                                                                                                                                                                                                                                                                                                                                                                                                                             |



| Taxonomy Field                                                                                     | Description                                                                                                                                                                                                                                                                                                                                                                                                                                                                                                         |
|----------------------------------------------------------------------------------------------------|---------------------------------------------------------------------------------------------------------------------------------------------------------------------------------------------------------------------------------------------------------------------------------------------------------------------------------------------------------------------------------------------------------------------------------------------------------------------------------------------------------------------|
| Maintain list of national and international critical infrastructures                               | <p>Maintain the list of national and international critical infrastructures, sectors and assets up to date, i.e.:</p> <ol style="list-style-type: none"> <li>Maintain the classification of national critical infrastructures, taking account of the effects of disruption or destruction of a particular infrastructure (geographic extent of the damage and seriousness of the consequences)</li> <li>Identify and analyse geographic and sectoral interdependencies</li> </ol>                                   |
| Establish Operator security plan                                                                   | Develop, approve, and implement Operator security plan for each critical infrastructure                                                                                                                                                                                                                                                                                                                                                                                                                             |
| Apply case-specific protection measures                                                            | <p>Apply case-specific protection measures, i.e.:</p> <ol style="list-style-type: none"> <li>Employ security protection systems to detect or delay an attack or intrusion</li> <li>Detect malicious activities that threaten critical infrastructure and related operational activities across the sectors</li> <li>Implement intrusion detection and intrusion protection systems on sensitive or mission-critical networks and facilities to identify and prevent unauthorized access and exploitation</li> </ol> |
| Establish CI reporting mechanism                                                                   | Establish national and international critical infrastructures' risks, threats, and vulnerabilities reporting mechanism                                                                                                                                                                                                                                                                                                                                                                                              |
| <b>Coordinate and provide CII protection</b>                                                       | Coordinate and provide protection of critical information infrastructure (CII)                                                                                                                                                                                                                                                                                                                                                                                                                                      |
| Protect physical and cyber assets, networks, applications, and systems                             | Implement countermeasures, technologies, and policies to protect physical and cyber assets, networks, applications, and systems that could be exploited in order to cause harm                                                                                                                                                                                                                                                                                                                                      |
| Secure networks and CI based on risk assessment                                                    | Secure, to the extent possible, public and private networks and critical infrastructure (e.g. communication, financial, power grid, water, and transportation systems), based on results from risk assessment, mitigation, and incident response capabilities                                                                                                                                                                                                                                                       |
| Protect personal data                                                                              | Apply comprehensive personal data protection measures                                                                                                                                                                                                                                                                                                                                                                                                                                                               |
| Share cyber threat information and analysis                                                        | Share cyber threat information and analysis with the domestic and international actors to promote shared situational awareness                                                                                                                                                                                                                                                                                                                                                                                      |
| Implement standards for security, reliability, integrity, and availability of critical information | Implement risk-informed standards to ensure the security, reliability, integrity, and availability of critical information, records, and communications systems and services, and business continuity                                                                                                                                                                                                                                                                                                               |
| Identify, track, investigate, disrupt, and prosecute malicious actors                              | Leverage law enforcement and intelligence assets to identify, track, investigate, disrupt, and prosecute malicious actors                                                                                                                                                                                                                                                                                                                                                                                           |
| Back-up information and key processes                                                              | Ensure that essential information is backed up on remote servers and that redundant processes are implemented for key functions, reducing the potential consequences of cyber security incidents                                                                                                                                                                                                                                                                                                                    |

| Taxonomy Field                                     | Description                                                                                                                                                                                                                                                                                                                                                                                                                                                                                                                                       |
|----------------------------------------------------|---------------------------------------------------------------------------------------------------------------------------------------------------------------------------------------------------------------------------------------------------------------------------------------------------------------------------------------------------------------------------------------------------------------------------------------------------------------------------------------------------------------------------------------------------|
| Operational Functional Area “ <b>RESPONSE</b> ”    |                                                                                                                                                                                                                                                                                                                                                                                                                                                                                                                                                   |
| <b>Orient and decide</b>                           |                                                                                                                                                                                                                                                                                                                                                                                                                                                                                                                                                   |
| Determine the nature of the crisis                 | Collect information, determine and evaluate the nature of the crisis                                                                                                                                                                                                                                                                                                                                                                                                                                                                              |
| <i>Survey or/and investigate the affected area</i> | <i>Conduct inter-agency surveillance or/and investigation of the affected area</i>                                                                                                                                                                                                                                                                                                                                                                                                                                                                |
| <i>Conduct flights to collect information</i>      | <i>Conduct flight planning and operations to collect information and use data from airborne sensors for the assessment</i>                                                                                                                                                                                                                                                                                                                                                                                                                        |
| <i>Determine and evaluate crisis triggers</i>      | <i>Determine and evaluate the causes, nature and source of the hazard (threat) triggering the crisis</i>                                                                                                                                                                                                                                                                                                                                                                                                                                          |
| Conduct damage and needs assessment                | Conduct damage and needs assessment, i.e.: <ul style="list-style-type: none"> <li>a. Collect and integrate human and sensor data from the field and from airborne platforms</li> <li>b. Conduct situational analysis</li> <li>c. Conduct first damage and risk assessment</li> <li>d. Identify the immediate needs of affected populations</li> <li>e. Develop a model- and data-based prediction of crisis evolution and impact across domains</li> </ul>                                                                                        |
| Provide decision support                           | Provide decision support, i.e.: <ul style="list-style-type: none"> <li>a. Prepare information for decision-making</li> <li>b. Provide assessment of impact across vulnerabilities (people, property, environment)</li> <li>c. Facilitate the prediction of the hazard and its impact</li> <li>d. Develop and evaluate courses of action</li> <li>e. Prioritise tasks and key resources</li> <li>f. Translate information into actionable formats for crisis management users</li> <li>g. Provide scientific support to decision-making</li> </ul> |
| Manage warnings                                    | Manage warnings to the public, providers of essential services and operators of critical infrastructure, i.e.: <ul style="list-style-type: none"> <li>a. Prepare warnings</li> <li>b. Authorise warnings</li> <li>c. Deliver warnings</li> </ul>                                                                                                                                                                                                                                                                                                  |
| Decide on the introduction of crisis legislation   | Decide on the introduction of crisis legislation and other emergency measures, i.e.: <ul style="list-style-type: none"> <li>a. Introduce crisis legislation at national, regional or local level</li> <li>b. Take other emergency measures</li> <li>c. Deliver information on the situation and measures taken – nationally and internationally</li> </ul>                                                                                                                                                                                        |

| Taxonomy Field                                                  | Description                                                                                                                                                                                                                                                                                                                                                                                                                                                      |
|-----------------------------------------------------------------|------------------------------------------------------------------------------------------------------------------------------------------------------------------------------------------------------------------------------------------------------------------------------------------------------------------------------------------------------------------------------------------------------------------------------------------------------------------|
| Review and adjust the response plan                             | Review and adjust the response plan, i.e.: <ul style="list-style-type: none"> <li>a. Decide on initial engagement of government agencies, local authorities and non-governmental organisations</li> <li>b. Adjust the management procedures according to the situation</li> <li>c. Adjust the chain of command and decide on deploying mobile crisis management command centres</li> <li>d. Assess critical resource needs and ways of their delivery</li> </ul> |
| <b>Respond to the hazard</b>                                    |                                                                                                                                                                                                                                                                                                                                                                                                                                                                  |
| Activate crisis management bodies                               | Activate the crisis command and management bodies and centres                                                                                                                                                                                                                                                                                                                                                                                                    |
| Maintain shared situational awareness                           | Achieve and maintain shared situational awareness                                                                                                                                                                                                                                                                                                                                                                                                                |
| <i>Collect information from deployed sources</i>                | <i>Collect, manually and automatically, information from deployed operational centres, sensors, and other field equipment</i>                                                                                                                                                                                                                                                                                                                                    |
| <i>Integrate data and information from various sources</i>      | <i>Integrate data and information from various sources; Fuse historical data, models' outputs and real-time data feeds in various formats to enhance the decision-makers' situational awareness</i>                                                                                                                                                                                                                                                              |
| <i>Predict hazards' escalation and impact</i>                   | <i>Predict hazards' (wildfire, floods, radiation, chemical and biological agents, and others) propagation through real-time modelling and analysis by considering the variability of wind speed and direction, humidity and fuel moisture forecast and other relevant factors</i>                                                                                                                                                                                |
| <i>Develop and sustain COP</i>                                  | <i>Develop and sustain a common operational picture (COP), based on information on hazard sources and evolution, identified vulnerabilities and potential risks</i>                                                                                                                                                                                                                                                                                              |
| <i>Disseminate COP and assessments</i>                          | <i>Disseminate the common operational picture and assessments</i>                                                                                                                                                                                                                                                                                                                                                                                                |
| Conduct coordinated operational tasking and resource management | Conduct coordinated operational tasking (re-tasking) and resource management, i.e.: <ul style="list-style-type: none"> <li>a. Define, prioritise and assign tasks</li> <li>b. Identify sites suitable for command posts, staging areas, and ingress/egress routes</li> <li>c. Monitor and position resources</li> <li>d. Pool and share resources</li> <li>e. Assign resources to tasks</li> <li>f. Exchange information on tasks and resources</li> </ul>       |
| Deploy responders                                               | Command and manage deployment of the responders                                                                                                                                                                                                                                                                                                                                                                                                                  |
| <i>Determine the area of operations</i>                         | <i>Determine the area of crisis operation(s)</i>                                                                                                                                                                                                                                                                                                                                                                                                                 |
| <i>Conduct first on-site hazard and consequence assessment</i>  | <i>Conduct or support first on-site hazard and consequence assessment, i.e. by establishing multi-agency investigation teams to improve the knowledge on the causes of the crisis</i>                                                                                                                                                                                                                                                                            |

| <b>Taxonomy Field</b>                                  | <b>Description</b>                                                                                                                                                                                                                                                                                                                                                                                                                      |
|--------------------------------------------------------|-----------------------------------------------------------------------------------------------------------------------------------------------------------------------------------------------------------------------------------------------------------------------------------------------------------------------------------------------------------------------------------------------------------------------------------------|
| <i>Deploy first responders</i>                         | <p><i>Command and manage deployment of first responders, incl.:</i></p> <ul style="list-style-type: none"> <li><i>a. Support the efforts of first-responder teams in the management of multi-causal situations</i></li> <li><i>b. Provide the first-responders with advanced hazard behaviour prediction through real-time risk analysis by considering the variability of hazard-specific characteristics</i></li> </ul>               |
| <i>Manage organised volunteers</i>                     | <i>Manage the deployment of organised volunteers and their tasking, resourcing, control, re-deployment, etc.</i>                                                                                                                                                                                                                                                                                                                        |
| <i>Manage spontaneous volunteers</i>                   | <i>Manage the on-site spontaneous volunteers</i>                                                                                                                                                                                                                                                                                                                                                                                        |
| <i>Manage deployment and delivery of first aid</i>     | <i>Manage deployment and delivery of resources for first aid</i>                                                                                                                                                                                                                                                                                                                                                                        |
| <i>Command response operations</i>                     | <i>Command, coordinate, and manage response operations</i>                                                                                                                                                                                                                                                                                                                                                                              |
| Secure digital infrastructure and assets               | <p>Take immediate measures to safeguard the functionality of digital infrastructure, i.e.:</p> <ul style="list-style-type: none"> <li>a. Filter or assign lower priority to suspicious network traffic</li> <li>b. Reconfigure critical CM networks</li> <li>c. Shut down specific services or parts of the CM network when a detected cyberattack is affecting the confidentiality or integrity of ongoing CM communication</li> </ul> |
| Manage international support                           | <p>Manage international support, i.e.:</p> <ul style="list-style-type: none"> <li>a. Request international support</li> <li>b. Establish a coordination body, transportation routes, storage facilities</li> <li>c. Provide support to the international first responders</li> <li>d. Establish a mechanism for international financial support</li> </ul>                                                                              |
| <b>Limit the impact of the crisis</b>                  |                                                                                                                                                                                                                                                                                                                                                                                                                                         |
| Contain hazardous causes of the crisis                 | Apply measures to contain hazardous causes of the crisis                                                                                                                                                                                                                                                                                                                                                                                |
| <i>Fight and contain fires</i>                         | <i>Conduct firefighting and containment</i>                                                                                                                                                                                                                                                                                                                                                                                             |
| <i>Control floods</i>                                  | <i>Conduct flood control operations</i>                                                                                                                                                                                                                                                                                                                                                                                                 |
| <i>Detect explosives and mitigate potential impact</i> | <i>Detect explosives and undertake measures to mitigate their potential impact</i>                                                                                                                                                                                                                                                                                                                                                      |

| <b>Taxonomy Field</b>                                  | <b>Description</b>                                                                                                                                                                                                                                                                                                                                                                                                                                                                                                                                                                                                                                                                                                                                                                                                                          |
|--------------------------------------------------------|---------------------------------------------------------------------------------------------------------------------------------------------------------------------------------------------------------------------------------------------------------------------------------------------------------------------------------------------------------------------------------------------------------------------------------------------------------------------------------------------------------------------------------------------------------------------------------------------------------------------------------------------------------------------------------------------------------------------------------------------------------------------------------------------------------------------------------------------|
| <i>Control the range of CBRN agents</i>                | <p><i>Control the range of chemical, biological agents and radiation/nuclear agents or HAZMATs, incl.:</i></p> <ol style="list-style-type: none"> <li><i>Gather, assess and disseminate the available information to first responders</i></li> <li><i>Assess the scene, e.g. by first responders using Chemical, Biological and Radiological detection, identification and monitoring equipment to recognise the signs and indicators of CBRN or HAZMATs</i></li> <li><i>Isolate the scene to mitigate the consequences and establish inner and outer cordon (hot/warm/cold zone)</i></li> <li><i>Establish quarantine area for contaminated victims/casualties, as well as decontamination and triage areas</i></li> <li><i>Conduct CBRN and HAZMATs response operations, including decontamination, evacuation, and others</i></li> </ol> |
| Take immediate law enforcement measures                | <p>Take immediate law enforcement measures, i.e.:</p> <ol style="list-style-type: none"> <li>Isolate the area affected by the crisis</li> <li>Establish emergency traffic control</li> <li>Maintain public order within the affected area</li> <li>Launch investigations</li> <li>Open-up lines of transportation and communication to safe(r) areas</li> </ol>                                                                                                                                                                                                                                                                                                                                                                                                                                                                             |
| Protect CI from secondary damage                       | Identify damaged critical infrastructure and key assets and coordinate immediate actions to protect them from secondary damage                                                                                                                                                                                                                                                                                                                                                                                                                                                                                                                                                                                                                                                                                                              |
| Limit the impact of failure of digital infrastructures | Limit the impact of digital infrastructures and assets' partial damage or complete dysfunctionality on the ability to manage the crisis, to provide aid and services within affected areas, the ability of affected people to communicate, and the functionality of critical systems as electric power and gas delivery, air and railroad transportation, public communications, banking, and others                                                                                                                                                                                                                                                                                                                                                                                                                                        |
| <b>Support affected people</b>                         |                                                                                                                                                                                                                                                                                                                                                                                                                                                                                                                                                                                                                                                                                                                                                                                                                                             |
| Conduct SAR operations                                 | Conduct search and rescue operations: Search for missing people, rescue the victims, provide first aid, and move the people to safety                                                                                                                                                                                                                                                                                                                                                                                                                                                                                                                                                                                                                                                                                                       |
| Provide on-site first aid                              | Provide on-site emergency ambulances, first treatment service and psychological first aid                                                                                                                                                                                                                                                                                                                                                                                                                                                                                                                                                                                                                                                                                                                                                   |
| Provide evacuation and shelter                         | Provide evacuation and shelter within and outside the affected area                                                                                                                                                                                                                                                                                                                                                                                                                                                                                                                                                                                                                                                                                                                                                                         |
| <i>Evacuate and shelter within the affected area</i>   | <i>Conduct evacuation operations and provide shelter (e.g. in tents) within the affected area</i>                                                                                                                                                                                                                                                                                                                                                                                                                                                                                                                                                                                                                                                                                                                                           |
| <i>Evacuate and shelter outside the affected area</i>  | <i>Conduct evacuation operations and provide shelter outside the affected area</i>                                                                                                                                                                                                                                                                                                                                                                                                                                                                                                                                                                                                                                                                                                                                                          |
| <i>Provide temporary housing</i>                       | <i>Provide temporary, longer-term housing</i>                                                                                                                                                                                                                                                                                                                                                                                                                                                                                                                                                                                                                                                                                                                                                                                               |
| <i>Provide for evacuees</i>                            | <i>Provide health care, MHPSS care, nutrition, and sanitation to evacuees and communication to/reunification with their relatives</i>                                                                                                                                                                                                                                                                                                                                                                                                                                                                                                                                                                                                                                                                                                       |

| <b>Taxonomy Field</b>                                | <b>Description</b>                                                                                                                                                                                                                                                                                                                                                                                       |
|------------------------------------------------------|----------------------------------------------------------------------------------------------------------------------------------------------------------------------------------------------------------------------------------------------------------------------------------------------------------------------------------------------------------------------------------------------------------|
| Decontaminate persons                                | Provide decontamination, degassing and disinfection of persons                                                                                                                                                                                                                                                                                                                                           |
| Provide off-site health and MHPSS services           | Provide off-site health care and MHPSS services: <ul style="list-style-type: none"> <li>a. Deploy field hospitals</li> <li>b. Provide transportation to regular hospitals</li> <li>c. Apply quarantine and isolation measures</li> <li>d. Perform mass prophylaxis and vaccination</li> <li>e. Provide psychological, psychosocial, paediatric and other specific care</li> </ul>                        |
| Provide essential services to the affected community | Provide essential services such as emergency power to critical facilities; fuel supplies and potable water, mobile communications, and food and pharmaceuticals to the affected community                                                                                                                                                                                                                |
| Provide MHPSS                                        | Provide mental health and psycho-social support (MHPSS) to professional responders, volunteers and the affected population                                                                                                                                                                                                                                                                               |
| Establish emergency mobile phone                     | Establish special emergency mobile telephone access                                                                                                                                                                                                                                                                                                                                                      |
| Provide care for animals                             | Provide care for animals in the affected area                                                                                                                                                                                                                                                                                                                                                            |
| <b>Build the ground for relief and recovery</b>      |                                                                                                                                                                                                                                                                                                                                                                                                          |
| Restore the delivery of basic services               | Restore or provide for basic services and needs, e.g. water, food, energy, communications, etc.                                                                                                                                                                                                                                                                                                          |
| Decontaminate assets and infrastructure              | Conduct decontamination, inactivation, and detoxification of buildings, equipment, machines and land                                                                                                                                                                                                                                                                                                     |
| Initiate disaster area cleaning                      | Initiate general cleaning of the affected area                                                                                                                                                                                                                                                                                                                                                           |
| Manage the transition from response to recovery      | Manage the transition from response to recovery and implementation of long-term consequence management plans; Implement demobilization and deactivation plans                                                                                                                                                                                                                                            |
| <b>Operational Functional Area “RECOVERY”</b>        |                                                                                                                                                                                                                                                                                                                                                                                                          |
| <b>Adjust the recovery planning</b>                  |                                                                                                                                                                                                                                                                                                                                                                                                          |
| Establish and share detailed COP                     | Establish detailed common operational picture and share it across the government, i.e.: <ul style="list-style-type: none"> <li>a. Organise inter-agency fact finding mission</li> <li>b. Integrate collected data and information</li> <li>c. Invite scientific support on concrete issues</li> <li>d. Study possible secondary and collateral hazards</li> <li>e. Provide assessment reports</li> </ul> |
| Provide for evidence-based decision-making           | Collect and verify data and develop tools to allow for evidence-based decision-making                                                                                                                                                                                                                                                                                                                    |
| Modify recovery plans and policies                   | Modify the recovery contingency plans, programmes, and policies as necessary                                                                                                                                                                                                                                                                                                                             |

| Taxonomy Field                                           | Description                                                                                                                                                                                                                                                                                                                                                                                                                                                                                                                                                                                                                                        |
|----------------------------------------------------------|----------------------------------------------------------------------------------------------------------------------------------------------------------------------------------------------------------------------------------------------------------------------------------------------------------------------------------------------------------------------------------------------------------------------------------------------------------------------------------------------------------------------------------------------------------------------------------------------------------------------------------------------------|
| Amend norms and legislation                              | Formulate and introduce required changes in legal norms or government decisions (adjustments, amendments or introduction of new case-specific norms)                                                                                                                                                                                                                                                                                                                                                                                                                                                                                               |
| <b>Provide immediate relief support</b>                  |                                                                                                                                                                                                                                                                                                                                                                                                                                                                                                                                                                                                                                                    |
| Expand the immediate health care                         | Expand the immediate health care, i.e.: <ul style="list-style-type: none"> <li>a. Notify affected people on the organisation of health care</li> <li>b. Take epidemic prevention measures</li> <li>c. Provide clinical care for the injured</li> <li>d. Apply infectious diseases' prevention and control measures</li> </ul>                                                                                                                                                                                                                                                                                                                      |
| Upgrade the temporary sheltering                         | Upgrade the temporary sheltering, i.e.: <ul style="list-style-type: none"> <li>a. Estimate the actual needs</li> <li>b. Mobilise mutual aid resources</li> <li>c. Request and manage international support for temporary sheltering</li> </ul>                                                                                                                                                                                                                                                                                                                                                                                                     |
| Provide psychosocial support                             | Provide psychosocial support to individuals and families                                                                                                                                                                                                                                                                                                                                                                                                                                                                                                                                                                                           |
| <i>Provide psychological support to relatives</i>        | <i>Provide psychological support to victims' relatives</i>                                                                                                                                                                                                                                                                                                                                                                                                                                                                                                                                                                                         |
| <i>Provide disaster welfare and family reunification</i> | <i>Collect, process, and disseminate disaster welfare and family reunification information</i>                                                                                                                                                                                                                                                                                                                                                                                                                                                                                                                                                     |
| Provide electricity                                      | Provide emergency electricity support                                                                                                                                                                                                                                                                                                                                                                                                                                                                                                                                                                                                              |
| Open critical transportation lines                       | Open and maintain critical transportation lines and manage their use                                                                                                                                                                                                                                                                                                                                                                                                                                                                                                                                                                               |
| <b>Engage the population</b>                             |                                                                                                                                                                                                                                                                                                                                                                                                                                                                                                                                                                                                                                                    |
| Maintain population's operational awareness              | Maintain the population's operational awareness on recovery operations and measures, i.e.: <ul style="list-style-type: none"> <li>a. Deliver public information on the situation, recovery organisation and plans</li> <li>b. Instruct people how to act in case of secondary hazards and collateral damage</li> <li>c. Advise people on how to behave/ act in the situation</li> <li>d. Provide people with the ability to communicate privately in case of damaged public digital infrastructure and communication channels</li> <li>e. Establish a liaison mechanism and communication channels between communities and institutions</li> </ul> |
| Organise volunteers and communities for recovery         | Organise activities of volunteers and communities in recovery operations                                                                                                                                                                                                                                                                                                                                                                                                                                                                                                                                                                           |
| <i>Manage organised volunteers during recovery</i>       | <i>Deploy, task, resource and oversee organised volunteers</i>                                                                                                                                                                                                                                                                                                                                                                                                                                                                                                                                                                                     |

| <b>Taxonomy Field</b>                                   | <b>Description</b>                                                                                                                                                                                                                                                                                                                                                                                                                                                                                            |
|---------------------------------------------------------|---------------------------------------------------------------------------------------------------------------------------------------------------------------------------------------------------------------------------------------------------------------------------------------------------------------------------------------------------------------------------------------------------------------------------------------------------------------------------------------------------------------|
| <i>Manage spontaneous volunteers during recovery</i>    | <i>Network spontaneous volunteers with professional staff and organised volunteers, provide instructions and resources</i>                                                                                                                                                                                                                                                                                                                                                                                    |
| <i>Activate PPPs to mobilise resources</i>              | <i>Activate public-private partnership mechanisms to mobilise, deliver and utilise resources</i>                                                                                                                                                                                                                                                                                                                                                                                                              |
| Identify communities' priorities and perceived benefits | Initiate a comprehensive on-site assessment to identify communities' priorities and the impact of potential recovery assistance measures                                                                                                                                                                                                                                                                                                                                                                      |
| <b>Manage humanitarian recovery</b>                     |                                                                                                                                                                                                                                                                                                                                                                                                                                                                                                               |
| Restore critical medical and MHPSS services             | Restore critical medical and MHPSS services, i.e.: <ul style="list-style-type: none"> <li>a. Provide comprehensive stress management, mental health and psychosocial support (MHPSS) and substance abuse services and programmes</li> <li>b. Establish (review, update) plans for sustainable medical recovery</li> <li>c. Ensure treatment by relevant health care institutions and procedures</li> <li>d. Identify and mobilise health care resources (budget, personnel, equipment, facilities)</li> </ul> |
| Provide reliable temporary sheltering                   | Provide safe and reliable temporary sheltering and utilities                                                                                                                                                                                                                                                                                                                                                                                                                                                  |
| Establish temporary school organisation                 | Establish temporary organisation for schooling of children                                                                                                                                                                                                                                                                                                                                                                                                                                                    |
| Provide food, water, and energy for the population      | Provide regular deliveries of food, water, and energy for private use                                                                                                                                                                                                                                                                                                                                                                                                                                         |
| Support families' reunification                         | Facilitate and support reunification of families from the affected area                                                                                                                                                                                                                                                                                                                                                                                                                                       |
| Address the needs of vulnerable populations             | Address the needs of vulnerable populations, paying special attention to big families, people with disabilities, and relatives to victims                                                                                                                                                                                                                                                                                                                                                                     |
| Manage volunteers providing social services             | Assist local authorities in managing volunteers providing social and psychosocial services                                                                                                                                                                                                                                                                                                                                                                                                                    |
| <b>Recover essential services</b>                       |                                                                                                                                                                                                                                                                                                                                                                                                                                                                                                               |
| Restore sustainable delivery of electricity             | Restore and sustain the delivery of electricity to public and private users                                                                                                                                                                                                                                                                                                                                                                                                                                   |
| Restore delivery of potable water                       | Restore and sustain the delivery of potable water to public and private users                                                                                                                                                                                                                                                                                                                                                                                                                                 |
| Re-establish food supply chains                         | Restore and sustain supply chains for basic foods                                                                                                                                                                                                                                                                                                                                                                                                                                                             |
| Restore mass transportation                             | Restore and sustain basic mass transportation services                                                                                                                                                                                                                                                                                                                                                                                                                                                        |



| <b>Taxonomy Field</b>                               | <b>Description</b>                                                                                                                                                                                                                                                                                                                                                                                                                                                                                                                                                                                                                                                                                                                                                                                                                                                                                                       |
|-----------------------------------------------------|--------------------------------------------------------------------------------------------------------------------------------------------------------------------------------------------------------------------------------------------------------------------------------------------------------------------------------------------------------------------------------------------------------------------------------------------------------------------------------------------------------------------------------------------------------------------------------------------------------------------------------------------------------------------------------------------------------------------------------------------------------------------------------------------------------------------------------------------------------------------------------------------------------------------------|
| Restore delivery of fuels                           | Restore and sustain the delivery of all main types of fuel to public and private users                                                                                                                                                                                                                                                                                                                                                                                                                                                                                                                                                                                                                                                                                                                                                                                                                                   |
| Restore local public services                       | Support the restoration of local public services, with schools, health and social care services as highest priority                                                                                                                                                                                                                                                                                                                                                                                                                                                                                                                                                                                                                                                                                                                                                                                                      |
| Restore mass communications and Internet            | Restore mass communications, e.g. telephone services, Internet connectivity and GPS links throughout the affected area to help direct survivors to areas of safety and provide links with emergency services                                                                                                                                                                                                                                                                                                                                                                                                                                                                                                                                                                                                                                                                                                             |
| Restore banking and commercial services             | Support the restoration of banking and other commercial services                                                                                                                                                                                                                                                                                                                                                                                                                                                                                                                                                                                                                                                                                                                                                                                                                                                         |
| Restore postal services                             | Re-establish the state postal service; support the restoration of other postal services                                                                                                                                                                                                                                                                                                                                                                                                                                                                                                                                                                                                                                                                                                                                                                                                                                  |
| Restore the solid waste collection system           | Restore and sustain the system for collection of solid waste and waste disposal                                                                                                                                                                                                                                                                                                                                                                                                                                                                                                                                                                                                                                                                                                                                                                                                                                          |
| <b>Manage economic recovery</b>                     |                                                                                                                                                                                                                                                                                                                                                                                                                                                                                                                                                                                                                                                                                                                                                                                                                                                                                                                          |
| Assess economic reconstruction needs                | Coordinate and conduct comprehensive inter-agency and public-private economic reconstruction needs assessment Assess economic consequences at the national, regional, and local level, evaluate and justify government's involvement in economic recovery                                                                                                                                                                                                                                                                                                                                                                                                                                                                                                                                                                                                                                                                |
| Plan long-term economic recovery                    | Plan long-term economic recovery efforts, i.e.: <ul style="list-style-type: none"> <li>a. Coordinate government, regional, local, and private efforts</li> <li>b. Coordinate agricultural recovery programmes</li> <li>c. Introduce monetary instruments (e.g. assistance loans) to support the recovery of local industry, agriculture, trade, and tourism</li> </ul>                                                                                                                                                                                                                                                                                                                                                                                                                                                                                                                                                   |
| Provide jobs' incentives or unemployment assistance | Provide affected people with incentives to keep their jobs or special unemployment assistance                                                                                                                                                                                                                                                                                                                                                                                                                                                                                                                                                                                                                                                                                                                                                                                                                            |
| <b>Manage infrastructure recovery</b>               | Manage infrastructure recovery by performing the following functions: <ul style="list-style-type: none"> <li>a. Coordinate and conduct comprehensive governmental and public-private reconstruction and rehabilitation needs assessment</li> <li>b. Develop prioritised policy, plans, and programmes for infrastructure recovery</li> <li>c. Mobilise public, private, and international resources for infrastructure recovery programmes</li> <li>d. Establish special legal norms and financial mechanisms to support individual and business infrastructure reconstruction</li> <li>e. Coordinate the rehabilitation of buildings and transportation infrastructure</li> <li>f. Provide governmental engineering services and other support to local authorities for public works and reconstruction of infrastructure</li> <li>g. Integrate state, local, and private efforts in infrastructure recovery</li> </ul> |
| <b>Manage environmental recovery</b>                |                                                                                                                                                                                                                                                                                                                                                                                                                                                                                                                                                                                                                                                                                                                                                                                                                                                                                                                          |

| Taxonomy Field                                                                   | Description                                                                                                                                                                             |
|----------------------------------------------------------------------------------|-----------------------------------------------------------------------------------------------------------------------------------------------------------------------------------------|
| Conduct environmental decontamination                                            | Coordinate and conduct decontamination and other measures to eliminate crisis' effects on the environment                                                                               |
| Clean up the affected area                                                       | Clean up the affected area from hazardous waste                                                                                                                                         |
| Develop policy for sustainable rehabilitation                                    | Conduct long-term environmental impact assessments and develop policy and programme for sustainable rehabilitation                                                                      |
| Remove damaged structures and debris                                             | Remove damaged structures; manage debris to reduce environmental and human impact                                                                                                       |
| Common Functional Area <b>"CRISIS COMMUNICATIONS AND INFORMATION MANAGEMENT"</b> |                                                                                                                                                                                         |
| <b>Establish CCIM <sup>1</sup> organisation</b>                                  |                                                                                                                                                                                         |
| Set-up an integrated CCIM network                                                | Set-up an integrated Crisis Communications and Information Management network                                                                                                           |
| <i>Identify stakeholders' CCIM capabilities and procedures</i>                   | <i>Identify stakeholders' available crisis communications and information management capabilities and interoperability issues</i>                                                       |
| <i>Define requirements for CCIM infrastructure</i>                               | <i>Define sectoral and geographic requirements for crisis communications and information management infrastructure</i>                                                                  |
| <i>Establish CM operations infrastructure</i>                                    | <i>Establish crisis management operations infrastructure for decision-making, organising, and controlling operations</i>                                                                |
| <i>Establish information management infrastructure</i>                           | <i>Establish information management infrastructure for collecting, storing, processing, analysing, and disseminating the information needed for decision-making</i>                     |
| <i>Organise CCIM's cybersecurity</i>                                             | <i>Establish cybersecurity roles and responsibilities of central and local authorities and participating agencies and procedures for information exchange, tasking and coordination</i> |
| Establish a concept of CCIM operations                                           | Coordinate and establish a concept of crisis communications and information management operations                                                                                       |

---

<sup>1</sup> CCIM – Crisis Communications and Information Management

| Taxonomy Field                                                        | Description                                                                                                                                                                                                                                                                                                                                                                                                                                                                                                                                                                                                                                                                                                                                                                                                                                                                                                                                                                                                            |
|-----------------------------------------------------------------------|------------------------------------------------------------------------------------------------------------------------------------------------------------------------------------------------------------------------------------------------------------------------------------------------------------------------------------------------------------------------------------------------------------------------------------------------------------------------------------------------------------------------------------------------------------------------------------------------------------------------------------------------------------------------------------------------------------------------------------------------------------------------------------------------------------------------------------------------------------------------------------------------------------------------------------------------------------------------------------------------------------------------|
| Regulate access to CM communications and information                  | <p>Regulate access to crisis management communications and information, i.e.:</p> <ol style="list-style-type: none"> <li>Define and coordinate overall rules for access to CM communications and information and standards for certification of networks, infrastructure, and personnel</li> <li>Develop and coordinate crisis communications and information management documentation and procedures across state agencies, local authorities, private entities, and volunteer organisations</li> <li>Establish standards, procedures and channels for granting and revoking employee access to resources or systems</li> <li>Establish procedures for authentication of users and dynamic modification of permissions during an emergency</li> <li>Periodically review the access protocols for each critical asset or system to ensure that the right individuals have authorised access</li> </ol>                                                                                                                 |
| Provide secure storing and exchange of content                        | <p>Provide secure storing and exchange of content, i.e.:</p> <ol style="list-style-type: none"> <li>Establish structured information exchange system for data transformation and routing</li> <li>Develop collaborative tools for secure storing and exchange of data</li> <li>Develop collaborative tools for enterprise content management</li> </ol>                                                                                                                                                                                                                                                                                                                                                                                                                                                                                                                                                                                                                                                                |
| <b>Conduct and coordinate communications and information planning</b> |                                                                                                                                                                                                                                                                                                                                                                                                                                                                                                                                                                                                                                                                                                                                                                                                                                                                                                                                                                                                                        |
| Activate an inter-agency CCIM team                                    | Organise/activate an inter-agency crisis communications and information management team to set up mechanisms for collecting, analysing, producing, and disseminating crisis information                                                                                                                                                                                                                                                                                                                                                                                                                                                                                                                                                                                                                                                                                                                                                                                                                                |
| Develop communications policy, plans and procedures                   | <p>Develop communications policy, plans and procedures to support government agencies, local authorities, private and volunteer organisations, i.e.:</p> <ol style="list-style-type: none"> <li>Make and maintain an assessment of the communications and information environment</li> <li>Define each actor's communications and information management responsibilities and authority in the CM chain of command</li> <li>Clarify the target audience</li> <li>Develop implementation packages (audience, information, channels, tools, timeframe) and determine responsibilities</li> <li>Monitor, obtain institutional and public feedback and adjust as necessary</li> <li>Establish the ground for international cooperation in communications and information management</li> <li>Establish consultations and coordination among stakeholders in the development of communications policy, plans and procedures to facilitate the exchange of crisis relevant information before and during a crisis</li> </ol> |

| Taxonomy Field                                           | Description                                                                                                                                                                                                                                                                                                                                                                                                                                                                                                                                                                                                                                                                                                                                    |
|----------------------------------------------------------|------------------------------------------------------------------------------------------------------------------------------------------------------------------------------------------------------------------------------------------------------------------------------------------------------------------------------------------------------------------------------------------------------------------------------------------------------------------------------------------------------------------------------------------------------------------------------------------------------------------------------------------------------------------------------------------------------------------------------------------------|
| Develop cybersecurity policy, plans and procedures       | <p>Develop cybersecurity policy, plans and procedures to secure the functioning of CM networks based on an all-hazards approach, i.e.:</p> <ol style="list-style-type: none"> <li>Define the cybersecurity's place in the crisis management system</li> <li>Perform all-hazard inter-agency cyber risk assessment</li> <li>Identify expertise and capabilities at the sub-government levels of CM, private actors, including operators of digital infrastructure, and volunteers</li> <li>Place the cyber security decision-making within the overall CM multijurisdictional decision-making process</li> <li>Determine which organisations to involve and the roles they will play in protection, response and recovery operations</li> </ol> |
| Establish relationships between CM authorities and media | <p>Establish (renew) relationships between crisis management authorities (teams) and media, i.e.:</p> <ol style="list-style-type: none"> <li>Coordinate the format of deliverable information</li> <li>Coordinate the work of media staff within the affected area (rules of engagement and support from the CM agencies)</li> </ol>                                                                                                                                                                                                                                                                                                                                                                                                           |
| Manage the frequency spectrum in a crisis                | Establish norms and mechanism of national frequency spectrum management for crisis situations                                                                                                                                                                                                                                                                                                                                                                                                                                                                                                                                                                                                                                                  |
| Manage visibility in media                               | Manage the production, use and dissemination of visual materials via Internet, social networks, TV, and newspapers for the crisis management operations, agencies and volunteer organisations                                                                                                                                                                                                                                                                                                                                                                                                                                                                                                                                                  |
| Maintain a record of planning and decisions              | Maintain a record of the planning process and decisions to facilitate the evaluation of crisis operations                                                                                                                                                                                                                                                                                                                                                                                                                                                                                                                                                                                                                                      |
| <b>Create CCIM networks</b>                              |                                                                                                                                                                                                                                                                                                                                                                                                                                                                                                                                                                                                                                                                                                                                                |
| Build CCIM components and functionalities                | Define, build, and maintain the crisis communications and information management system's components and functionalities                                                                                                                                                                                                                                                                                                                                                                                                                                                                                                                                                                                                                       |
| <i>Manage data</i>                                       | <i>Manage access to data, data processing and distribution</i>                                                                                                                                                                                                                                                                                                                                                                                                                                                                                                                                                                                                                                                                                 |
| <i>Establish all-hazards database</i>                    | <i>Establish all-hazards CM database and regulate the access to it</i>                                                                                                                                                                                                                                                                                                                                                                                                                                                                                                                                                                                                                                                                         |
| <i>Integrate decision support</i>                        | <p><i>Integrate CM decision support systems and tools, incl.:</i></p> <ol style="list-style-type: none"> <li><i>Incorporate into the decision support system(s) the outputs – status and forecasts – of the spread of hazards and their impact</i></li> <li><i>Integrate into the decision support system(s) the assessment of cross-domain vulnerabilities and their impact</i></li> <li><i>Combine data from various sources and models' output to provide decision support to crisis managers and commanders</i></li> </ol>                                                                                                                                                                                                                 |
| <i>Provide for crowd sourcing</i>                        | <i>Create opportunities for application of relevant modes of crowd sourcing; disseminate the information on such opportunities</i>                                                                                                                                                                                                                                                                                                                                                                                                                                                                                                                                                                                                             |

| Taxonomy Field                                      | Description                                                                                                                                                                                                                                                                                                                                                                                                                                                                                                                                                                                                                                                                                                                      |
|-----------------------------------------------------|----------------------------------------------------------------------------------------------------------------------------------------------------------------------------------------------------------------------------------------------------------------------------------------------------------------------------------------------------------------------------------------------------------------------------------------------------------------------------------------------------------------------------------------------------------------------------------------------------------------------------------------------------------------------------------------------------------------------------------|
| Establish crisis communications capabilities        | Establish and maintain crisis communications capabilities, incl.: <ol style="list-style-type: none"> <li>Define the communications and information requirements for central authorities, first responders, regional and local authorities, volunteer organisations and private entities</li> <li>Secure interoperable communications with responders, authorities and stakeholders in any environmental conditions through standards and coordination of acquisition</li> <li>Provide capability to obtain critical information remotely about the extent, perimeter, or internal developments in the zone of the incident or crisis</li> <li>Establish coordination with corporate communications systems and assets</li> </ol> |
| Establish emergency call services                   | Establish emergency call services; disseminate information and guidance on the use of such services                                                                                                                                                                                                                                                                                                                                                                                                                                                                                                                                                                                                                              |
| Establish information management capabilities       | Establish and maintain crisis information management capabilities                                                                                                                                                                                                                                                                                                                                                                                                                                                                                                                                                                                                                                                                |
| <i>Identify information needs of stakeholders</i>   | <i>Identify and analyse the information needs of crisis management stakeholders</i>                                                                                                                                                                                                                                                                                                                                                                                                                                                                                                                                                                                                                                              |
| <i>Integrate data collection tools</i>              | <i>Design and integrate tools for data collection, incl.:</i> <ol style="list-style-type: none"> <li><i>Provide near real-time feed of actual data to allow for assessment of threats and reliable forecasts by the crisis managers and commanders during response operations</i></li> <li><i>Integrate data collection tools in a common data and information management architecture to assure interoperability</i></li> </ol>                                                                                                                                                                                                                                                                                                 |
| <i>Determine reporting flows</i>                    | <i>Describe and approve reporting flows and provide guidance to CM actors</i>                                                                                                                                                                                                                                                                                                                                                                                                                                                                                                                                                                                                                                                    |
| <i>Ascertain the quality of data</i>                | <i>Check and ascertain the relevance and the quality of data</i>                                                                                                                                                                                                                                                                                                                                                                                                                                                                                                                                                                                                                                                                 |
| <i>Define information management procedures</i>     | <i>Define and coordinate information management procedures among stakeholders to facilitate the exchange of crisis related information</i>                                                                                                                                                                                                                                                                                                                                                                                                                                                                                                                                                                                       |
| <i>Set-up data storage and retrieval</i>            | <i>Set-up data storage and retrieval procedures and assets</i>                                                                                                                                                                                                                                                                                                                                                                                                                                                                                                                                                                                                                                                                   |
| <i>Set-up data analysis</i>                         | <i>Determine data analysis procedures and provide respective capacity</i>                                                                                                                                                                                                                                                                                                                                                                                                                                                                                                                                                                                                                                                        |
| <i>Set-up dissemination and information sharing</i> | <i>Define dissemination principles and routes for sharing information among CM actors and stakeholders</i>                                                                                                                                                                                                                                                                                                                                                                                                                                                                                                                                                                                                                       |
| Provide CCIM technology support                     | Provide technologies to support crisis communications and information management, including solutions for interoperability                                                                                                                                                                                                                                                                                                                                                                                                                                                                                                                                                                                                       |
| <b>Continuously improve CCIM</b>                    |                                                                                                                                                                                                                                                                                                                                                                                                                                                                                                                                                                                                                                                                                                                                  |

| <b>Taxonomy Field</b>                                              | <b>Description</b>                                                                                                                                                                                                                                                                                                                                                                                                                                                                                                                                                                                                                              |
|--------------------------------------------------------------------|-------------------------------------------------------------------------------------------------------------------------------------------------------------------------------------------------------------------------------------------------------------------------------------------------------------------------------------------------------------------------------------------------------------------------------------------------------------------------------------------------------------------------------------------------------------------------------------------------------------------------------------------------|
| Establish equipment and training standards                         | Establish and enforce the implementation of equipment and training standards                                                                                                                                                                                                                                                                                                                                                                                                                                                                                                                                                                    |
| Implement training programmes for CCIM                             | Develop and implement training programmes for crisis (protection, response, and relief) communications and information management, i.e.: <ul style="list-style-type: none"> <li>a. Develop and conduct exercises to test the knowledge and skills of individuals and organisational capabilities for using crisis communications and information</li> <li>b. Conduct exercises to test the interoperability, reliability and cybersecurity of the communications equipment and software</li> <li>c. Conduct crisis response exercises to assess readiness</li> <li>d. Conduct multinational, national, regional, and local exercises</li> </ul> |
| <b>Exploit CCIM for protection, response, and recovery</b>         |                                                                                                                                                                                                                                                                                                                                                                                                                                                                                                                                                                                                                                                 |
| Secure warning and alerting                                        | Secure warning and alerting to all command levels, CM agencies, and the public                                                                                                                                                                                                                                                                                                                                                                                                                                                                                                                                                                  |
| <i>Ensure the functioning of critical communications</i>           | <i>Ensure that all critical communications networks are functioning</i>                                                                                                                                                                                                                                                                                                                                                                                                                                                                                                                                                                         |
| <i>Communicate hazard information within the CM system</i>         | <i>Communicate hazard (threat) information within the CM system</i>                                                                                                                                                                                                                                                                                                                                                                                                                                                                                                                                                                             |
| <i>Communicate hazard information to the public</i>                | <i>Communicate hazard (threat) information to the public</i>                                                                                                                                                                                                                                                                                                                                                                                                                                                                                                                                                                                    |
| <i>Communicate directly with media and citizens</i>                | <i>Involve crisis managers in direct communication with media and citizens</i>                                                                                                                                                                                                                                                                                                                                                                                                                                                                                                                                                                  |
| Provide communications and information support to C3               | Provide operational communications and information support to C3 by certain organisations (e.g. professional responders) to other stakeholders (e.g. local authorities, private actors, volunteers) to facilitate e.g. interoperability                                                                                                                                                                                                                                                                                                                                                                                                         |
| <i>Communicate operational information across chain of command</i> | <i>Communicate operational information across the crisis management chain of command</i>                                                                                                                                                                                                                                                                                                                                                                                                                                                                                                                                                        |
| <i>Provide communications with and between task groups</i>         | <i>Provide secure communications with and between search and rescue and first responders task groups</i>                                                                                                                                                                                                                                                                                                                                                                                                                                                                                                                                        |
| <i>Provide communications with volunteers</i>                      | <i>Provide reliable communications and information exchange with volunteer formations and spontaneous volunteers</i>                                                                                                                                                                                                                                                                                                                                                                                                                                                                                                                            |
| <i>Deploy field communications</i>                                 | <i>Deploy mobile crisis communications system(s) within the affected area</i>                                                                                                                                                                                                                                                                                                                                                                                                                                                                                                                                                                   |

| Taxonomy Field                                                                    | Description                                                                                                                                                                                                                                                                                                                                                                                                                                                                                                                                |
|-----------------------------------------------------------------------------------|--------------------------------------------------------------------------------------------------------------------------------------------------------------------------------------------------------------------------------------------------------------------------------------------------------------------------------------------------------------------------------------------------------------------------------------------------------------------------------------------------------------------------------------------|
| <i>Facilitate data processing/ lift</i>                                           | <i>Facilitate data processing, including operational data lift, i.e. data transfer to decision makers, e.g. an incident commander</i>                                                                                                                                                                                                                                                                                                                                                                                                      |
| <i>Conduct information analysis and evaluation</i>                                | <i>Conduct permanent information analysis and evaluation</i>                                                                                                                                                                                                                                                                                                                                                                                                                                                                               |
| <i>Provide communications support to local authorities and the private sector</i> | <i>Coordinate and provide open communications support to local authorities and the private sector to assist awareness, protection, response and relief operations</i>                                                                                                                                                                                                                                                                                                                                                                      |
| Support C3 decision making                                                        | Support decision making in the processes of command, control, and coordination, e.g. by implementing analysis, assessment and predictive models and tools                                                                                                                                                                                                                                                                                                                                                                                  |
| Provide information to media and the public                                       | Prepare and provide relevant and adequate information to media and the public                                                                                                                                                                                                                                                                                                                                                                                                                                                              |
| <i>Provide information on the crisis impact</i>                                   | <i>Provide or facilitate producing resources (photographs, maps, graphics, videos, press releases, etc.) that document the impact of the emergency and of disaster response actions</i>                                                                                                                                                                                                                                                                                                                                                    |
| <i>Advise the leadership on working with media</i>                                | <i>Advise the CM leadership on working with the media (monitoring their work, coordination)</i>                                                                                                                                                                                                                                                                                                                                                                                                                                            |
| Monitor media coverage                                                            | Organise and conduct monitoring of media coverage on the impact of the emergency, progress in disaster response made by the CM agencies, recommendations to the population, etc.                                                                                                                                                                                                                                                                                                                                                           |
| Detect and debunk deception and rumours in social media                           | Detect and debunk deception and rumours in the social media regarding the crisis situation                                                                                                                                                                                                                                                                                                                                                                                                                                                 |
| Common Functional Area “ <b>COMMAND, CONTROL, AND COORDINATION (C3)</b> ”         |                                                                                                                                                                                                                                                                                                                                                                                                                                                                                                                                            |
| <b>Build and maintain the C3 system</b>                                           |                                                                                                                                                                                                                                                                                                                                                                                                                                                                                                                                            |
| Design, test, and validate the C3 system                                          | Design, test, and validate the C3 system by components and in its entirety, i.e.: <ul style="list-style-type: none"> <li>a. Establish C3 system for each participating agency (i.e. state or local organisation with CM functions)</li> <li>b. Determine the levels of command and establish C3 system for each command level, e.g. operational, local, regional, and national (central)</li> <li>c. Provide doctrinal and technical interoperability and integrate agencies’ and authorities’ levels of command and management</li> </ul> |
| Prepare C3 personnel                                                              | Select, train and certify C3 personnel                                                                                                                                                                                                                                                                                                                                                                                                                                                                                                     |
| Establish C3 information systems                                                  | Establish C3 information systems and information system management                                                                                                                                                                                                                                                                                                                                                                                                                                                                         |
| Establish C3 procedures                                                           | Establish C3 procedures at all levels of command and management                                                                                                                                                                                                                                                                                                                                                                                                                                                                            |

| Taxonomy Field                                      | Description                                                                                                                                                                                                                                                                                                                                                                                                                                                                                                                                                                                                                                               |
|-----------------------------------------------------|-----------------------------------------------------------------------------------------------------------------------------------------------------------------------------------------------------------------------------------------------------------------------------------------------------------------------------------------------------------------------------------------------------------------------------------------------------------------------------------------------------------------------------------------------------------------------------------------------------------------------------------------------------------|
| Provide equipment, software, codes                  | Provide required equipment, software, codes, etc.                                                                                                                                                                                                                                                                                                                                                                                                                                                                                                                                                                                                         |
| Provide fixed and mobile command facilities         | Provide fixed and mobile (field, deployable) command infrastructure, equipment, software, personnel, training, etc.                                                                                                                                                                                                                                                                                                                                                                                                                                                                                                                                       |
| Maintain integrity of the C3 system                 | Maintain the integrity of the system for command, control, and coordination                                                                                                                                                                                                                                                                                                                                                                                                                                                                                                                                                                               |
| <b>Establish the command component</b>              |                                                                                                                                                                                                                                                                                                                                                                                                                                                                                                                                                                                                                                                           |
| Define the CM chain of command                      | Define the CM chain of command, i.e.: <ul style="list-style-type: none"> <li>a. Establish C3 at central, regional, and local levels</li> <li>b. Define authority and responsibilities at each level</li> <li>c. Define a framework and rules of delegating authority</li> <li>d. Define procedures and provide guidelines for incident, emergency, and crisis command and management</li> <li>e. Provide command integrity while transitioning from incident toward emergency and crisis management</li> </ul>                                                                                                                                            |
| Establish decision-making environment and resources | Establish CM relevant decision-making environment and dedicate resources                                                                                                                                                                                                                                                                                                                                                                                                                                                                                                                                                                                  |
| <b>Establish the control component</b>              |                                                                                                                                                                                                                                                                                                                                                                                                                                                                                                                                                                                                                                                           |
| Design a control system                             | Design a control system along the chain of command, i.e.: <ul style="list-style-type: none"> <li>a. Define the control tasks for decision-making, operations and resource planning, and implementation feedback</li> <li>b. Determine rules of control within each level and across all levels of command</li> <li>c. Establish planning and decision-preparing procedures for crisis environment</li> <li>d. Formulate execution information (decisions, directives, orders, commands) and provide templates for each level of command</li> <li>e. Provide integrity while transitioning from incident toward emergency and crisis management</li> </ul> |
| Establish control capability at each command level  | Establish control capability at each level of command including information, communications, and organisation (personnel)                                                                                                                                                                                                                                                                                                                                                                                                                                                                                                                                 |
| Determine the principles of information exchange    | Determine the principles of exchange of CM information among agencies and levels of authority                                                                                                                                                                                                                                                                                                                                                                                                                                                                                                                                                             |
| Provide scientific and technical advice             | Provide in-house scientific and technical advice and ready access to external expertise                                                                                                                                                                                                                                                                                                                                                                                                                                                                                                                                                                   |
| Establish rules for reporting                       | Establish rules for reporting on results and performance                                                                                                                                                                                                                                                                                                                                                                                                                                                                                                                                                                                                  |
| <b>Establish the coordination component</b>         |                                                                                                                                                                                                                                                                                                                                                                                                                                                                                                                                                                                                                                                           |



| Taxonomy Field                                                                | Description                                                                                                                                                                                                                                                                                                                                                                                                                                                                                                                                                                                                                                  |
|-------------------------------------------------------------------------------|----------------------------------------------------------------------------------------------------------------------------------------------------------------------------------------------------------------------------------------------------------------------------------------------------------------------------------------------------------------------------------------------------------------------------------------------------------------------------------------------------------------------------------------------------------------------------------------------------------------------------------------------|
| Establish internal coordination                                               | Establish mechanisms for internal coordination: <ul style="list-style-type: none"> <li>a. Between various ministries, agencies or policy sectors (horizontal)</li> <li>b. Between parent ministry and subordinate agencies/bodies in the same sector (vertical)</li> </ul>                                                                                                                                                                                                                                                                                                                                                                   |
| Establish coordination with societal, private and international organisations | Establish mechanisms for coordination with civil society organisations, the private sector, and international organisations                                                                                                                                                                                                                                                                                                                                                                                                                                                                                                                  |
| Establish professional coordination                                           | Establish professional coordination based on templates and permanent CM organisation/staff                                                                                                                                                                                                                                                                                                                                                                                                                                                                                                                                                   |
| Establish transborder coordination                                            | Establish coordination in response to a (potential) transborder crisis                                                                                                                                                                                                                                                                                                                                                                                                                                                                                                                                                                       |
| Establish coordination in transition from response to recovery                | Establish recovery coordination task group to manage the transition from response to recovery                                                                                                                                                                                                                                                                                                                                                                                                                                                                                                                                                |
| Establish coordination with media                                             | Establish coordination teams and common rules for media relations and communicating with the public                                                                                                                                                                                                                                                                                                                                                                                                                                                                                                                                          |
| <b>Exploit the C3 system</b>                                                  |                                                                                                                                                                                                                                                                                                                                                                                                                                                                                                                                                                                                                                              |
| Monitor the affected area                                                     | Establish comprehensive monitoring of the affected area, people, critical infrastructure and assets, and vital functions, including use of data from various sources to monitor the affected area comprehensively, enhance the situational awareness, and facilitate decision support                                                                                                                                                                                                                                                                                                                                                        |
| Provide situational awareness, share COP                                      | Provide situational awareness across the chain of command, collecting operational information, continuously assessing risks and threats, and building and sharing a Common Operational Picture (COP), incl.: <ul style="list-style-type: none"> <li>a. Exchange crisis-related information among organisations to contribute to situational awareness</li> <li>b. Integrate data from various sources and models to improve the COP and situational awareness</li> <li>c. Provide fusion of historical, real-time data and outputs of validated models, coming in various formats, to improve the managers' situational awareness</li> </ul> |
| Provide orientation of decision-makers                                        | Provide orientation of the decision-makers, proposing courses of action, priorities, resource allocation and other immediate measures                                                                                                                                                                                                                                                                                                                                                                                                                                                                                                        |
| Take and disseminate decisions                                                | Take, communicate, and disseminate decisions, directives, commands and instructions                                                                                                                                                                                                                                                                                                                                                                                                                                                                                                                                                          |
| Task responders                                                               | Provide tasking to all responders                                                                                                                                                                                                                                                                                                                                                                                                                                                                                                                                                                                                            |
| C3 SAR and first responders' operations                                       | Command, control, and coordinate Search and Rescue and first responders' operations                                                                                                                                                                                                                                                                                                                                                                                                                                                                                                                                                          |
| C3 volunteers' operations                                                     | Command, control, and coordinate volunteers' actions and operations                                                                                                                                                                                                                                                                                                                                                                                                                                                                                                                                                                          |

| Taxonomy Field                                       | Description                                                                                                                                                                                                                                                                                                                                                                            |
|------------------------------------------------------|----------------------------------------------------------------------------------------------------------------------------------------------------------------------------------------------------------------------------------------------------------------------------------------------------------------------------------------------------------------------------------------|
| Manage and support international responders          | Manage and support the international responders' actions and operations                                                                                                                                                                                                                                                                                                                |
| Provide continuous deliberate planning               | Provide continuous deliberate planning according to set priorities                                                                                                                                                                                                                                                                                                                     |
| C3 delivery of critical support assets               | Command, control, and coordinate delivery of critical support assets (transport, UAVs/drones, specialised aircrafts, satellite imagery, international information, etc.)                                                                                                                                                                                                               |
| Establish ad-hoc task groups                         | Establish ad-hoc groups with tasking to manage specific problems                                                                                                                                                                                                                                                                                                                       |
| Maintain scientific and technology advisory capacity | Maintain permanent capacity to provide scientific and technology advice to decision-makers and planners                                                                                                                                                                                                                                                                                |
| Manage resources to cope with priority tasks         | Manage materiel and other resources to support the performance of priority tasks                                                                                                                                                                                                                                                                                                       |
| Provide warning and alerts for secondary hazards     | Continue to provide public and institutional warning and alerting for secondary hazards, collateral threats and related developments                                                                                                                                                                                                                                                   |
| Deliver public information and advice                | Deliver public information, guidance, instructions and advice                                                                                                                                                                                                                                                                                                                          |
| Common Functional Area "LOGISTICS"                   |                                                                                                                                                                                                                                                                                                                                                                                        |
| <b>Establish crisis logistics management system</b>  |                                                                                                                                                                                                                                                                                                                                                                                        |
| Identify the components of crisis logistics support  | Identify the components of the crisis logistics support structure, i.e.: <ul style="list-style-type: none"> <li>a. Define roles and responsibilities of logistics managers and organisations</li> <li>b. Provide a concept of operations for logistics support</li> <li>c. Establish principles and procedures for logistics support between agencies and local authorities</li> </ul> |
| Establish supply chains                              | Establish a system of crisis supply chains management                                                                                                                                                                                                                                                                                                                                  |
| Provide end-to-end visibility of resources           | Establish and manage an infrastructure and database to provide end-to-end visibility of crisis response resources                                                                                                                                                                                                                                                                      |
| Develop logistics policy, plans, and programmes      | Identify required resources and develop crisis logistics policy, plans, and programmes                                                                                                                                                                                                                                                                                                 |
| Establish logistics C3                               | Establish a system for command, control, and coordination of logistics                                                                                                                                                                                                                                                                                                                 |
| Provide norms for procurement in crises              | Provide norms, procedures and responsibilities for procurement and contracting during crises                                                                                                                                                                                                                                                                                           |
| <b>Manage materiel logistics</b>                     |                                                                                                                                                                                                                                                                                                                                                                                        |
| Determine materiel requirements                      | Determine materiel requirements for operational functions and command levels                                                                                                                                                                                                                                                                                                           |

| <b>Taxonomy Field</b>                                       | <b>Description</b>                                                                                                                                                                                                                                                                                                                                                                                                                                                                                                                                                                                                                                    |
|-------------------------------------------------------------|-------------------------------------------------------------------------------------------------------------------------------------------------------------------------------------------------------------------------------------------------------------------------------------------------------------------------------------------------------------------------------------------------------------------------------------------------------------------------------------------------------------------------------------------------------------------------------------------------------------------------------------------------------|
| Perform <i>production logistics</i> within "Preparedness"   | Perform <i>production logistics</i> within the "Preparedness" functional area, providing specification, design and production of required materiel                                                                                                                                                                                                                                                                                                                                                                                                                                                                                                    |
| Perform <i>consumer logistics</i>                           | Perform <i>consumer logistics</i> , providing storage, repair, maintenance of CM materiel and its disposal                                                                                                                                                                                                                                                                                                                                                                                                                                                                                                                                            |
| Perform <i>supply logistics</i>                             | Perform <i>supply logistics</i> , determining stock levels, provisioning, distribution and replenishment of materiel between responders and CM command levels                                                                                                                                                                                                                                                                                                                                                                                                                                                                                         |
| Perform <i>maintenance and repair logistics</i>             | Perform <i>maintenance and repair logistics</i> during 'Protection,' 'Response' and 'Recovery'                                                                                                                                                                                                                                                                                                                                                                                                                                                                                                                                                        |
| Create common operational framework for prioritisation      | Create common operational framework to prioritise the use of key assets, needed by various task forces                                                                                                                                                                                                                                                                                                                                                                                                                                                                                                                                                |
| <b>Conduct transportation logistics</b>                     |                                                                                                                                                                                                                                                                                                                                                                                                                                                                                                                                                                                                                                                       |
| Plan, organise, and resource transportation logistics       | Plan, organise, and resource transportation logistics for protection, crisis response and recovery                                                                                                                                                                                                                                                                                                                                                                                                                                                                                                                                                    |
| Provide transportation of responders and supplies           | Provide transportation of responders and supplies to and within the affected area: <ul style="list-style-type: none"> <li>a. Provide strategic transportation</li> <li>b. Meet responders' requests for transportation</li> <li>c. Provide transportation of materials, medicine and medical materials, food and water for first aid to affected people</li> </ul>                                                                                                                                                                                                                                                                                    |
| Provide transportation equipment and procedures for its use | Provide transportation equipment and establish procedures for moving materiel from storage facilities and vendors to people in the affected area, evacuation camps and other crisis response facilities                                                                                                                                                                                                                                                                                                                                                                                                                                               |
| Provide transportation support to other stakeholders        | Provide transportation support to other agencies, task groups, spontaneous volunteers, etc.                                                                                                                                                                                                                                                                                                                                                                                                                                                                                                                                                           |
| Transport debris and waste                                  | Provide transportation of debris and waste                                                                                                                                                                                                                                                                                                                                                                                                                                                                                                                                                                                                            |
| <b>Provide medical logistics</b>                            |                                                                                                                                                                                                                                                                                                                                                                                                                                                                                                                                                                                                                                                       |
| Plan medical logistics                                      | Plan, coordinate, contract, and resource medical logistics for crisis response and recovery, i.e.: <ul style="list-style-type: none"> <li>a. Estimate medicines' and other medical materials requirements for incidents, emergency, and crisis situations and establish reserves according to the hazards risk mapping</li> <li>b. Maintain database of the national, regional and local medical organisations, medical personnel, and medical materials</li> <li>c. Develop and maintain policy, plans, and programmes for securing CM medical logistics capacity</li> <li>d. Establish public-private partnerships for medical logistics</li> </ul> |

| <b>Taxonomy Field</b>                                         | <b>Description</b>                                                                                                                                                                                                                                                                                                                                                                                                                                                                                                                                                                                                                                                                                                    |
|---------------------------------------------------------------|-----------------------------------------------------------------------------------------------------------------------------------------------------------------------------------------------------------------------------------------------------------------------------------------------------------------------------------------------------------------------------------------------------------------------------------------------------------------------------------------------------------------------------------------------------------------------------------------------------------------------------------------------------------------------------------------------------------------------|
| Provide medical supplies                                      | Coordinate and provide medical supplies to meet operational requests                                                                                                                                                                                                                                                                                                                                                                                                                                                                                                                                                                                                                                                  |
| Direct additional national and international medical support  | Accept and direct additional national and international medical support for the victims                                                                                                                                                                                                                                                                                                                                                                                                                                                                                                                                                                                                                               |
| <b>Manage facilities</b>                                      |                                                                                                                                                                                                                                                                                                                                                                                                                                                                                                                                                                                                                                                                                                                       |
| Select storage and distribution facilities                    | Conduct location, selection, and acquisition of storage and distribution facilities                                                                                                                                                                                                                                                                                                                                                                                                                                                                                                                                                                                                                                   |
| Operate facilities and manage related services                | Establish and operate facilities and manage related services to shelter and support crisis responders                                                                                                                                                                                                                                                                                                                                                                                                                                                                                                                                                                                                                 |
| Manage evacuation camps and related services                  | Establish and operate facilities, temporary deployable accommodation camps and other evacuation facilities, and manage related services, within and outside the affected area                                                                                                                                                                                                                                                                                                                                                                                                                                                                                                                                         |
| Manage acquired property                                      | Manage property acquired to support crisis response and relief operations                                                                                                                                                                                                                                                                                                                                                                                                                                                                                                                                                                                                                                             |
| Operate waste and debris management facilities                | Identify, establish and operate facilities for management of waste and debris, enabling reuse, and recovery where possible, and disposal when required                                                                                                                                                                                                                                                                                                                                                                                                                                                                                                                                                                |
| <b>Provide logistics services</b>                             | Provide operational re-supply, map distribution, labour resources, postal and courier services, canteen, laundry and bathing facilities, burials, etc., for responders, volunteers, the people in temporary shelters, hospitals, and housings within and outside the affected area                                                                                                                                                                                                                                                                                                                                                                                                                                    |
| <b>Common Functional Area “SECURITY MANAGEMENT”</b>           |                                                                                                                                                                                                                                                                                                                                                                                                                                                                                                                                                                                                                                                                                                                       |
| <b>Conduct security orientation and planning</b>              |                                                                                                                                                                                                                                                                                                                                                                                                                                                                                                                                                                                                                                                                                                                       |
| Develop security component in CM plans and systems            | <p>Develop security component in the national, regional, and local crisis management plans and systems, i.e.:</p> <ol style="list-style-type: none"> <li>Within the crisis management scenarios, identify security threats, issues and responses</li> <li>Identify and cluster inter-agency security capabilities requirements</li> <li>Establish a model of using security capabilities for crisis management functions</li> <li>Develop a security operations plan for the crisis management system</li> <li>Introduce security chapters in the crisis management planning at all command and management levels</li> <li>Establish and maintain security preparedness assessment and reporting mechanism</li> </ol> |
| Establish programmes for acquisition of security capabilities | Establish central, agency-specific, regional, and local programmes for acquisition of security capabilities                                                                                                                                                                                                                                                                                                                                                                                                                                                                                                                                                                                                           |
| Establish preliminary coordination                            | Establish pre-crisis security management coordination                                                                                                                                                                                                                                                                                                                                                                                                                                                                                                                                                                                                                                                                 |

| Taxonomy Field                                            | Description                                                                                                                                                                                                                                                                                                                                                                                                                                                           |
|-----------------------------------------------------------|-----------------------------------------------------------------------------------------------------------------------------------------------------------------------------------------------------------------------------------------------------------------------------------------------------------------------------------------------------------------------------------------------------------------------------------------------------------------------|
| Develop security preparedness guidance                    | Develop and promulgate preparedness guidance on security preparedness                                                                                                                                                                                                                                                                                                                                                                                                 |
| Provide performance guidelines                            | Provide performance directives, guidelines, and instructions                                                                                                                                                                                                                                                                                                                                                                                                          |
| Introduce security specific norms                         | Introduce security specific norms as part of the crisis management legislation                                                                                                                                                                                                                                                                                                                                                                                        |
| <b>Establish security management organisation</b>         |                                                                                                                                                                                                                                                                                                                                                                                                                                                                       |
| Establish security coordination and control organisations | Establish security coordination and control organisations according to the CM chain of command, as well as in private and non-governmental entities planned to engage in CM operations                                                                                                                                                                                                                                                                                |
| Establish a crisis security clearance system              | Establish a crisis security clearance system, i.e.: <ul style="list-style-type: none"> <li>a. Establish a national authentication and security identification certification system for emergency responders and official personnel and other non-governmental personnel requiring access to affected areas</li> <li>b. Establish a national database of cleared crisis management staff and volunteers</li> </ul>                                                     |
| Introduce chief security officer                          | Introduce chief security officer (manager) in each crisis command and management entity                                                                                                                                                                                                                                                                                                                                                                               |
| Establish secure information exchange                     | Establish a system to exchange security information                                                                                                                                                                                                                                                                                                                                                                                                                   |
| Provide expertise and coordination for security planning  | Provide expertise and coordination for security planning efforts and for conducting technical assessments (e.g. vulnerability assessments, risk analyses, surveillance sensor architecture, etc.)                                                                                                                                                                                                                                                                     |
| <b>Provide key security capabilities</b>                  |                                                                                                                                                                                                                                                                                                                                                                                                                                                                       |
| Staff with qualified personnel                            | Staff with qualified personnel, i.e.: <ul style="list-style-type: none"> <li>a. Establish key competencies' requirements for security staff</li> <li>b. Select, motivate, certify, and maintain professional security staff at national and local levels, as well as for private and non-governmental entities</li> </ul>                                                                                                                                             |
| Develop and conduct security management training          | Develop and conduct training to improve all-hazard security management capability, i.e.: <ul style="list-style-type: none"> <li>a. Develop standardised training courses on security management</li> <li>b. Provide training courses for the security officers</li> <li>c. Tailor security management courses and provide training for volunteers</li> <li>d. Deliver guidelines on crisis security to the population, business entities, and institutions</li> </ul> |

| Taxonomy Field                                     | Description                                                                                                                                                                                                                                                                                                                                                                                                                                                                                                                                                                                                                                                                                                                                                                                                                            |
|----------------------------------------------------|----------------------------------------------------------------------------------------------------------------------------------------------------------------------------------------------------------------------------------------------------------------------------------------------------------------------------------------------------------------------------------------------------------------------------------------------------------------------------------------------------------------------------------------------------------------------------------------------------------------------------------------------------------------------------------------------------------------------------------------------------------------------------------------------------------------------------------------|
| Supply security control equipment                  | Supply security control equipment, i.e. provide specialised security assets such as traffic barriers; chemical, biological, radiological, nuclear, and high-yield explosives detection devices; canine units; law enforcement personal protective gear; etc.                                                                                                                                                                                                                                                                                                                                                                                                                                                                                                                                                                           |
| <b>Exercise on-site security control</b>           |                                                                                                                                                                                                                                                                                                                                                                                                                                                                                                                                                                                                                                                                                                                                                                                                                                        |
| Test critical infrastructure security plans        | Develop and implement exercise programmes to test critical infrastructure security plans                                                                                                                                                                                                                                                                                                                                                                                                                                                                                                                                                                                                                                                                                                                                               |
| Ensure safe and secure CM environment              | <p>Ensure a safe and secure environment through law enforcement and related security and protection operations for people and communities located within affected areas and for all responders engaged in CM operations, i.e.:</p> <ul style="list-style-type: none"> <li>a. Perform early on-site assessment actions</li> <li>b. Establish security control system in the affected area</li> <li>c. Develop (review) a site security plan</li> <li>d. Develop and implement case-specific physical security measures, countermeasures, and procedures</li> <li>e. Conduct security operations within, on the borders, and outside the affected area where evacuees are temporarily placed</li> <li>f. Share security related information with state and local officials, the private sector and the public, as appropriate</li> </ul> |
| Perform access, traffic, and crowd control         | <p>Perform access, traffic, and crowd control within and on the borders of the affected area, in temporary evacuation facilities and camps, i.e.:</p> <ul style="list-style-type: none"> <li>a. Provide security forces to support state and local efforts to control access to the incident site and critical facilities</li> <li>b. Provide security forces and establish protective measures around the affected site, critical infrastructure, and critical facilities</li> <li>c. Secure protection of emergency responders and other workers operating in a high-threat environment, and provide operational security of emergency response operations wherever they may occur</li> <li>d. Establish public traffic control</li> <li>e. Deploy capacities for crowd control</li> </ul>                                           |
| Coordinate security measures with other operations | Coordinate security measures with other search and rescue, response and recovery operations                                                                                                                                                                                                                                                                                                                                                                                                                                                                                                                                                                                                                                                                                                                                            |

| Taxonomy Field                         | Description                                                                                                                                                                                                                                                                                                                                                                                                                                                                                                                                                                                                                                                                                                                                                                                                                                                                                                                                                                                                         |
|----------------------------------------|---------------------------------------------------------------------------------------------------------------------------------------------------------------------------------------------------------------------------------------------------------------------------------------------------------------------------------------------------------------------------------------------------------------------------------------------------------------------------------------------------------------------------------------------------------------------------------------------------------------------------------------------------------------------------------------------------------------------------------------------------------------------------------------------------------------------------------------------------------------------------------------------------------------------------------------------------------------------------------------------------------------------|
| Ensure responders' safety and security | <p>Ensure the safety and security of all on-the-scene responders by developing a structured and standardised system of protocols and procedures for all responders, including:</p> <ul style="list-style-type: none"> <li>a. Establish site management and control to provide physical security of the response operations and the follow-up recovery measures</li> <li>b. Identify the scope and nature of the problem, including the eventual presence of CBRN and other hazardous materials</li> <li>c. Evaluate the immediate risk to the responders and establish limits of access and movement ('hot zones' or an inner safety perimeter)</li> <li>d. Provide all crisis response personnel with the type of personal protective clothing and equipment appropriate for the mandated tasks</li> <li>e. Provide immediate healthcare support to the responders in case of need</li> <li>f. Safeguard the emotional and mental wellbeing of emergency/crisis responders, including stress management</li> </ul> |
